# Supplementary material for: Polycondensation Resins by Flavonoid Tannins Reaction with Amines
Source: PubMed Central journal article supplement (PMC6432223; doi:10.3390/polym9020037), 2017-01-25
Supplement: polymers-09-00037-s001.pdf [file polymers-09-00037-s001.pdf]

# Supplementary Materials: Polycondensation Resins by Flavonoid Tannins Reaction with Amines

Francisco-Jose Santiago-Medina, Antonio Pizzi, Maria Cecilia Basso, Luc Delmotte and Alain Celzard

## 1. Mimosa Tannin Reactions

For each sample the number refers to the temperature (65, 100 and 185 °C) and the letter sAB = mimosa + hexamethylenediamine A = mimosa + hexamethylenediamine + pTSA and B = mimosa + hexamethylenediamine + NaOH.

In the case of the samples at 180 °C, they have not been analysed because the spectra are not very good due to these samples unable to be well-dissolved in the acetone–water solution before their measurements in the MALDI.

AB is mimosa + hexamethylenediamine without no acid or base catalyst

Legend

F = fisitinidin

C = catechin

G = gallicocatechin

HMDA= Hexamethylenediamine

“-” = covalent bond

“(+)(-)” = ionic bond

“(+)(-)Na = Na<sup>+</sup> linked to flavonoid units phenolic –OHs as –O<sup>-</sup>Na<sup>+</sup>

## B100

**Table S1.** Structures determined by MALDI ToF of the reaction of mimosa + hexamethylenediamine + NaOH at 100 °C.

| Experimental | Calculated (Da) | Descrip. Cal (Da)                    | Description                               | Number Ionic Bonds | Number Covalent Bonds |
|--------------|-----------------|--------------------------------------|-------------------------------------------|--------------------|-----------------------|
| 372          | 372             | 274 + 116 – 18                       | F-HMDA                                    | -                  | 1                     |
| 390          | 390             | 274 + 116                            | F(-)(+)HMDA                               | 1                  | -                     |
| 410          | 410             | 290 – 17 + 114 + 23                  | F-HMDA(-)(+)Na                            | -                  | 1                     |
| 426          | 426             | 306 + 114 – 17 + 23                  | G-HMDA(-)(+)Na                            | -                  | 1                     |
| 428          | 428             | 290 + 115 + 23                       | C(-)(+)HMDA(-)(+)Na                       | 1                  | -                     |
| 444          | 444             | 306 + 115 + 23                       | G(-)(+)HMDA(-)(+)Na                       | 1                  | -                     |
| 488          | 488             | 274 – 17 + 115 + 116                 | HMDA(+)(-)F-HMDA                          | 1                  | 1                     |
| 468          | 468             | 274 + 114 × 2 – 17 × 2               | (HMDA-F-HMDA) less 2H <sup>+</sup>        | -                  | 2                     |
| 484          | 484             | 290 + 114 × 2 – 17 × 2               | (HMDA-C-HMDA) less 2H <sup>+</sup>        | -                  | 2                     |
| 500          | 500             | 304 + 2 + 114 × 2 – 17 – 17          | (HMDA-G-HMDA) less 2H <sup>+</sup>        | -                  | 2                     |
| 524          | 524             | 306 + 114 + 115 – 17 – 17 + 23       | (G[HMDA] <sub>2</sub> )(-)(+)Na           | -                  | 2                     |
| 525          | 525             | 290 + 114 + 115 – 17 + 23            | HMDA-C(-)(+)HMDA(-)(+)Na                  | 1                  | 1                     |
| 528          | 528             | 274 + 116 + 114 + 23                 | HMDA(+)(-)F(-)(+)HMDA(-)(+)Na             | 2                  | -                     |
| 540          | 542             | 306 + 115 × 2 – 17 + 23              | [HMDA(+)(-)G-HMDA](-)(+)Na                | 1                  | 1                     |
| 562          | 562             | 272 + 288 + 2                        | Dimer                                     | -                  | -                     |
| 564          | 564             | 306 + 114 + 115 – 17 + 23 × 2        | Na(+)(-)HMDA(+)(-)G-HMDA(-)(+)Na          | 1                  | 1                     |
| 578          | 578             | 288 + 288 + 2                        | Dimer                                     | -                  | -                     |
| 612          | 610             | 304 + 304 + 2                        | Dimer                                     | -                  | -                     |
| 617          | 618             | 306 + 115 × 2 – 17 × 2 + 116         | HMDA(+)(-)G(HMDA) <sub>2</sub>            | 1                  | 2                     |
| 621          | 622             | 306 + 115 × 2 +<br>114 – 17 × 3 + 23 | [G(HMDA) <sub>3</sub> ](-)(+)Na           | -                  | 3                     |
| 638          | 640             | 306 + 115 × 3 – 17 – 17 + 23         | [HMDA(+)(-)G(HMDA) <sub>2</sub> ](-)(+)Na | 1                  | 2                     |
| 643          | 644             | 272 + 272 + 2 + 114 – 17             | F-F-HMDA                                  | -                  | 1                     |

|         |      |                                                      |                                                              |   |   |
|---------|------|------------------------------------------------------|--------------------------------------------------------------|---|---|
| 642     | 642  | 272 + 288 + 2 + 114 - 17 × 2                         | F-HMDA-C                                                     | - | 2 |
| 653     | 654  | 306 + 116 × 3                                        | G[(-)(+)HMDA] <sub>3</sub>                                   | 3 | - |
| 661     | 660  | 272 + 288 + 2 + 115 - 17                             | F-C-HMDA                                                     | - | 1 |
| 661     | 662  | 272 + 272 + 2 + 116                                  | F-F(-)(+)HMDA                                                | 1 | - |
| 677     | 676  | 306 + 116 × 2 + 115 + 23                             | [HMDA(+)(-)] <sub>2</sub> : G (-)(+)HMDA(-)(+)Na             | 3 | - |
| 677     | 678  | 272 + 288 + 2 + 116                                  | F-C(-)(+)HMDA                                                | 1 | - |
| 682     | 682  | 272 + 288 + 2 + 114 - 17 + 23                        | [F-C-HMDA]                                                   | - | 1 |
| 687     | 688  | 272 + 2 + 115 × 3 +<br>114 × 17 × 4 + 23             | [F(HMDA) <sub>4</sub> ] <sub>4</sub> (-)(+)Na                | - | 4 |
| 695     | 694  | 288 + 288 + 2 + 116                                  | C-C(-)(+)HMDA                                                | 1 | - |
| 701     | 701  | 272 + 288 + 2 + 116 + 23                             | [F-C(-)(+)HMDA] <sub>2</sub> (-)(+)Na                        | 1 | - |
| 716     | 717  | 288 + 288 + 2 + 116 + 23                             | [C-C(-)(+)HMDA] <sub>2</sub> (-)(+)Na                        | 1 | - |
| 723     | 723  | 272 + 272 + 2 + 114 +<br>115 - 17 × 3                | F-HMDA-F-HMDA                                                | - | 3 |
| 745     | 744  | 274 + 274 + 114 + 116<br>- 17 × 2                    | F-HMDA-F(-)(+)HMDA                                           | - | - |
| 740-743 | 742  | 274 + 274 + 2 + 115 × 2<br>- 17 × 2                  | HMDA-F-F-HMDA                                                | - | 2 |
| 757     | 758  | 272 + 288 + 2 +<br>115 × 2 - 17 × 2                  | HMDA-F-C-HMDA                                                | - | 2 |
| 761     | 760  | 274 + 290 + 114 -<br>17 × 2 + 116                    | F-HMDA-C(-)(+)HMDA                                           | 1 | 2 |
| 857     | 857  | 272 + 272 + 288 + 2 + 23                             | Trimer                                                       | - | - |
| 865     | 866  | 272 + 288 + 304 + 2                                  | Trimer                                                       | - | - |
| 881     | 880  | 272 × 2 + 2 + 115 × 3 -<br>17 × 2 + 23               | [(HMDA(+)(-)) <sub>2</sub> : (F-HMDA-F)](-)(+)Na             | 2 | 2 |
| 881     | 882  | 288 × 2 + 304 + 2                                    | Trimer                                                       | - | - |
| 898     | 898  | 272 × 2 + 2 + 114 × 3 - 17 + 23                      | [(HMDA(+)(-)) <sub>2</sub> : F-F-HMDA] <sub>2</sub> (-)(+)Na | 2 | 1 |
| 898     | 898  | 288 + 304 × 2 + 2                                    | Trimer                                                       | - | - |
| 906     | 905  | 288 × 2 + 304 + 2 + 23                               | Trimer                                                       | - | - |
| 921     | 921  | 288 + 304 × 2 + 2 + 23                               | Trimer                                                       | - | - |
| 1052    | 1052 | 857 + 114 + 115 - 17 × 2                             | [(F-C-F)(HMDA) <sub>2</sub> ] <sub>2</sub> (-)(+)Na          | - | 2 |
| 1069    | 1070 | 857 + 115 × 2 - 17                                   | [HMDA-(F-C-F)(-)(+)HMDA] <sub>2</sub> (-)(+)Na               | 1 | 1 |
| 1178    | 1178 | 288 × 4 + 2 + 23                                     | Tetramer                                                     | - | - |
| 1260    | 1258 | 288 × 2 + 2 + 116 - 18 ×<br>2 + 288 × 2 + 2 + 23 - 1 | [C-C-HMDA-C-C] <sub>2</sub> (-)(+)Na                         | - | 2 |
| 1330    | 1334 | 288 × 2 + 2 + 116 × 2 - 18 × 3 +<br>288 × 2 + 2      | C-C-HMDA-C-C-HMDA                                            | - | 3 |
| 1404    | 1404 | 272 × 2 + 2 + 116 × 3 - 18 × 2<br>+ 272 × 2 + 2      | HMDA(+)(-)F-F-HMDA-F-<br>F(-)(+)HMDA                         | 2 | 2 |

Period of 40 Da due to a diamine with 2Na<sup>+</sup>, thus 116 + 23 + 23 - 2 = 160 Da, thus 160/4 = 40 Da period:  
801-61-719-677-638-596-554-514-474-430-390-350.

**B100**

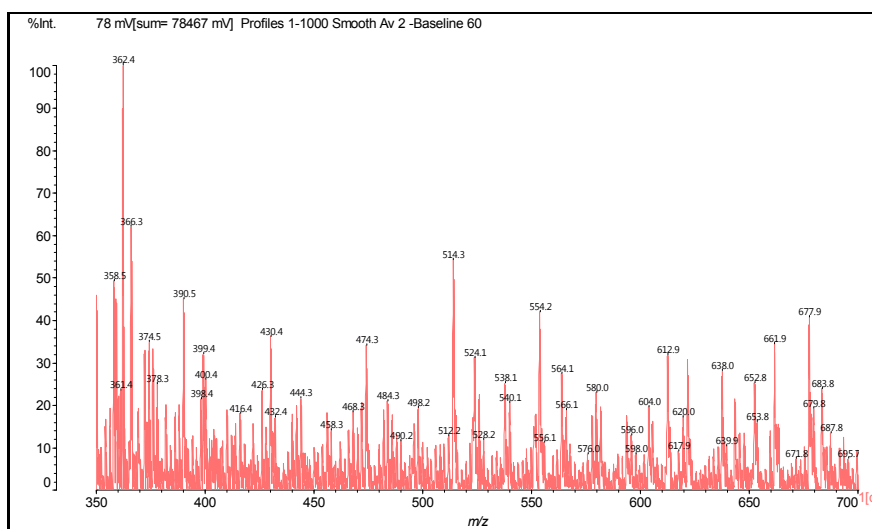

**Figure S1.** MALDI ToF spectrum of the reaction of mimosa + hexamethylenediamine + NaOH at 100 °C; 350–700 Da range.

**B100**

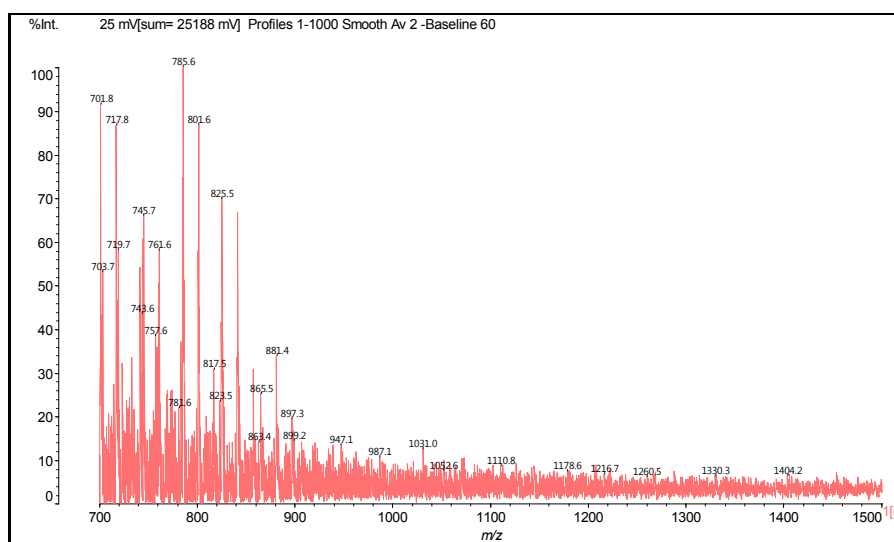

**Figure S2.** MALDI ToF spectrum of the reaction of mimosa + hexamethylenediamine + NaOH at 100 °C; 700–1500 Da range.

**A100**

**Table S2.** Structures determined by MALDI ToF of the reaction of mimosa + hexamethylenediamine + pTSA at 100 °C.

| Experimental | Calculated (Da) | Descrip. Cal (Da)              | Description                     | Number Ionic Bonds | Number Covalent Bonds |
|--------------|-----------------|--------------------------------|---------------------------------|--------------------|-----------------------|
| 371          | 372             | 274 + 116 – 18                 | F-HMDA                          | -                  | 1                     |
| 390          | 390             | 274 + 116                      | F(-)(+)HMDA                     | 1                  | -                     |
| 410          | 410             | 290 – 17 + 114 + 23            | F-HMDA(-)(+)Na                  | -                  | 1                     |
| 412          | 412             | 274 + 115 + 23                 | F(-)(+)HMDA(-)(+)Na             | 1                  | -                     |
| 428          | 428             | 290 + 115 + 23                 | C(-)(+)HMDA(-)(+)Na             | 1                  | -                     |
| 444          | 444             | 306 + 115 + 23                 | G(-)(+)HMDA(-)(+)Na             | 1                  | -                     |
| 486 or 490   | 488             | 274 – 17 + 115 + 116           | HMDA(+)(-)F-HMDA                | 1                  | 1                     |
| 486          | 484             | 290 + 114 × 2 – 17 × 2         | (HMDA-C-HMDA) + 2H+             | -                  | 2                     |
| 524          | 524             | 306 + 114 + 115 – 17 – 17 + 23 | (G[HMDA] <sub>2</sub> )(-)(+)Na | -                  | 2                     |
| 526          | 525             | 290 + 114 + 115 – 17 + 23      | HMDA-C(-)(+)HMDA(-)(+)Na        | 1                  | 1                     |
| 528          | 528             | 274 + 116 + 114 + 23           | HMDA(+)(-)F(-)(+)HMDA(-)(+)Na   | 2                  | -                     |
| 540          | 542             | 306 + 115 × 2 – 17 + 23        | [HMDA(+)(-)G-HMDA](-)(+)Na      | 1                  | 1                     |

|     |     |                                                 |                                                                |   |   |
|-----|-----|-------------------------------------------------|----------------------------------------------------------------|---|---|
| 564 | 564 | $306 + 114 + 115 - 17 + 23 \times 2$            | Na(+)(-)-HMMDA(+)(-)-G-HMMDA(-)(+)Na                           | 1 | 1 |
| 568 | 568 | $274 + 115 \times 3 - 17 \times 3$              | F[HMMDA] <sub>3</sub>                                          | - | 3 |
| 578 | 578 | $288 + 288 + 2$                                 | Dimer (small)                                                  | - | - |
| 612 | 610 | $304 + 304 + 2$                                 | Dimer                                                          | - | - |
| 621 | 622 | $306 + 115 \times 2 + 114 - 17 \times 3 + 23$   | [G(HMMDA) <sub>2</sub> ] <sup>-</sup> (+)(+)Na                 | - | 3 |
| 626 | 626 | $274 + 114 \times 3 - 17 + 23$                  | [HMMDA-F(-)(+)(+)HMMDA) <sub>2</sub> ] <sup>-</sup> (+)(+)Na   | 2 | 1 |
| 640 | 640 | $306 + 115 \times 3 - 17 - 17 + 23$             | [HMMDA(+)(-)-G(HMMDA) <sub>2</sub> ] <sup>-</sup> (+)(+)Na     | 1 | 2 |
| 643 | 644 | $272 + 272 + 2 + 114 - 17$                      | F-F-HMMDA                                                      | - | 1 |
| 643 | 642 | $272 + 288 + 2 + 114 - 17 \times 2$             | F-HMMDA-C                                                      | - | 2 |
| 661 | 660 | $272 + 288 + 2 + 115 - 17$                      | F-C-HMMDA                                                      | - | 1 |
| 661 | 662 | $272 + 272 + 2 + 116$                           | F-F(-)(+)HMMDA                                                 | 1 | - |
| 677 | 676 | $306 + 116 \times 2 + 115 + 23$                 | [HMMDA(+)(-)] <sub>2</sub> G <sup>-</sup> (+)(+)HMMDA(-)(+)Na  | 3 | - |
| 679 | 678 | $272 + 288 + 2 + 116$                           | F-C(-)(+)HMMDA                                                 | 1 | - |
| 683 | 682 | $272 + 288 + 2 + 114 - 17 + 23$                 | [F-C-HMMDA]                                                    | - | 1 |
| 695 | 694 | $288 + 288 + 2 + 116$                           | C-C(-)(+)HMMDA                                                 | 1 | - |
| 700 | 701 | $272 + 288 + 2 + 116 + 23$                      | [F-C(-)(+)HMMDA] <sup>-</sup> (+)(+)Na                         | 1 | - |
| 706 | 706 | $274 + 115 \times 4 - 17 \times 3 + 23$         | [(HMMDA) <sub>3</sub> F(-)(+)HMMDA] <sup>-</sup> (+)(+)Na      | 1 | 3 |
| 717 | 717 | $288 + 288 + 2 + 116 + 23$                      | [C-C(-)(+)HMMDA] <sup>-</sup> (+)(+)Na                         | 1 | - |
| 723 | 723 | $272 + 272 + 2 + 114 + 115 - 17 \times 3$       | F-HMMDA-F-HMMDA                                                | - | 3 |
| 745 | 744 | $274 + 274 + 114 + 116 - 17 \times 2$           | F-HMMDA-F(-)(+)HMMDA                                           | - | - |
| 758 | 758 | $272 + 288 + 2 + 115 \times 2 - 17 \times 2$    | HMDA-F-C-HMMDA                                                 | - | 2 |
| 761 | 760 | $274 + 290 + 114 - 17 \times 2 + 116$           | F-HMMDA-C(-)(+)HMMDA                                           | 1 | 2 |
| 761 | 760 | $272 + 272 + 2 + 115 - 17 + 116$                | HMDA-F-F(-)(+)HMMDA                                            | 1 | 1 |
| 777 | 776 | $272 + 288 + 2 + 114 \times 2 - 17$             | HMDA-F-C(-)(+)HMMDA                                            | 1 | 1 |
| 857 | 857 | $272 + 272 + 288 + 2 + 23$                      | Trimer                                                         | - | - |
| 880 | 880 | $272 - 2 + 2 + 115 \times 3 - 17 \times 2 + 23$ | [(HMMDA(+)(-)) <sub>2</sub> (F-HMMDA-F)] <sup>-</sup> (+)(+)Na | 2 | 2 |
| 882 | 882 | $288 \times 2 + 304 + 2$                        | Trimer                                                         | - | - |
| 897 | 898 | $272 \times 2 + 2 + 114 \times 3 - 17 + 23$     | [(HMMDA(+)(-)) <sub>2</sub> F-F-HMMDA] <sup>-</sup> (+)(+)Na   | 2 | 1 |
| 897 | 898 | $288 + 304 \times 2 + 2$                        | Trimer                                                         | - | - |
| 906 | 905 | $288 \times 2 + 304 + 2 + 23$                   | Trimer                                                         | - | - |
| 921 | 921 | $288 + 304 \times 2 + 2 + 23$                   | Trimer                                                         | - | - |

Two period of around 44 and 43 Da, respectively, are clear. The first from 1260 Da until 1876 Da and the second one from 1849 Da until 2067 Da. Something similar is found in the spectrum of the samples prepared at 180 °C, which they could barely be dissolved. Thus, it can be quite likely to be a measurement error. A third period of 40 Da, due to a diamine with  $2 \text{ Na}^+ + 116 + 23 + 23 - 2 = 160/4$ , is observed from 801 Da until 350 Da.

## A 100

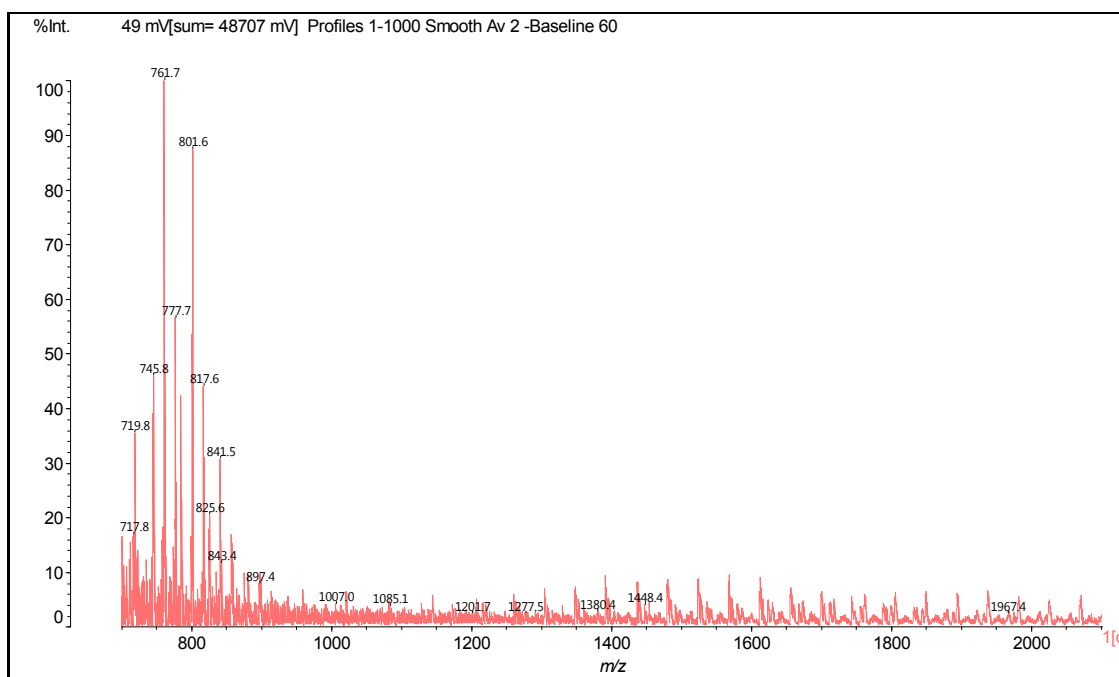

**Figure S3.** MALDI ToF spectrum of the reaction of mimosa + hexamethylenediamine + pTSA at 100 °C; 700–2200 Da range.

## sAB100

**Table S3.** Structures determined by MALDI ToF of the uncatalysed reaction of mimosa + hexamethylenediamine at 100°C.

| Experimental | Calculated (Da) | Descrip. Cal (Da)                  | Description                                             | Number Ionic Bonds | Number Covalent Bonds |
|--------------|-----------------|------------------------------------|---------------------------------------------------------|--------------------|-----------------------|
| 371          | 372             | 274 + 116 – 18                     | F-HMDA                                                  | -                  | 1                     |
| 390          | 390             | 274 + 116                          | F(-)(+)HMDA                                             | 1                  | -                     |
| 410          | 410             | 290-17 + 114 + 23                  | F-HMDA(-)(+)Na                                          | -                  | 1                     |
| 444          | 444             | 306 + 115 + 23                     | G(-)(+)HMDA(-)(+)Na                                     | 1                  | -                     |
| 488          | 488             | 274 – 17 + 115 + 116               | HMDA(+)(-)F-HMDA                                        | 1                  | 1                     |
| 468          | 468             | 274 + 114 × 2 – 17 × 2             | (HMDA-F-HMDA) <sub>2</sub> less 2H <sup>+</sup>         | -                  | 2                     |
| 486          | 484             | 290 + 114 × 2 – 17 × 2             | (HMDA-C-HMDA) + 2H <sup>+</sup>                         | -                  | 2                     |
| 508          | 507             | 290 + 115 + 114 – 17 × 2 + 23      | [C(HMDA) <sub>2</sub> ] <sub>2</sub> (+)(-)Na           | -                  | 2                     |
| 524          | 524             | 306 + 114 + 115 – 17 – 17 + 23     | (G[HMDA] <sub>2</sub> ) <sub>2</sub> (-)(+)Na           | -                  | 2                     |
| 526          | 525             | 290 + 114 + 115 – 17 + 23          | HMDA-C(-)(+)HMDA(-)(+)Na                                | 1                  | 1                     |
| 528          | 528             | 274 + 116 + 114 + 23               | HMDA(+)(-)F(-)(+)HMDA(-)(+)Na                           | 2                  | -                     |
| 560          | 560             | 306 + 114 × 2 + 3 + 23             | [G((-)(+)HMDA) <sub>2</sub> ] <sub>2</sub> (-)(+)Na     | 2                  | -                     |
| 564          | 564             | 306 + 114 + 115 – 17 + 23 × 2      | Na(+)(-)HMDA(+)(-)G-HMDA(-)(+)Na                        | 1                  | 1                     |
| 567          | 568             | 274 + 115 × 3 – 17 × 3             | F[HMDA] <sub>3</sub>                                    | -                  | 3                     |
| 579          | 578             | 288 + 288 + 2                      | Dimer                                                   | -                  | -                     |
| 612          | 610             | 304 + 304 + 2                      | Dimer                                                   | -                  | -                     |
| 619          | 618             | 306 + 115 × 2 – 17 × 2 + 116       | HMDA(+)(-)G(HMDA) <sub>2</sub>                          | 1                  | 2                     |
| 622          | 622             | 306 + 115 × 2 + 114 – 17 × 3 + 23  | [G(HMDA) <sub>2</sub> ] <sub>2</sub> (-)(+)Na           | -                  | 3                     |
| 640          | 640             | 306 + 115 × 3 – 17 – 17 + 23       | [HMDA(+)(-)G(HMDA) <sub>2</sub> ] <sub>2</sub> (-)(+)Na | 1                  | 2                     |
| 643          | 644             | 272 + 272 + 2 + 114 – 17           | F-F-HMDA                                                | -                  | 1                     |
| 643          | 642             | 272 + 288 + 2 + 114 – 17 × 2       | F-HMDA-C                                                | -                  | 2                     |
| 661          | 660             | 272 + 288 + 2 + 115 – 17           | F-C-HMDA                                                | -                  | 1                     |
| 661          | 662             | 272 + 272 + 2 + 116                | F-F(-)(+)HMDA                                           | 1                  | -                     |
| 677          | 676             | 306 + 116 × 2 + 115 + 23           | [HMDA(+)(-)] <sub>2</sub> G (-)(+)HMDA(-)(+)Na          | 3                  | -                     |
| 679          | 678             | 272 + 288 + 2 + 116                | F-C(-)(+)HMDA                                           | 1                  | -                     |
| 683          | 682             | 272 + 288 + 2 + 114 – 17 + 23      | [F-C-HMDA]                                              | -                  | 1                     |
| 695          | 694             | 288 + 288 + 2 + 116                | C-C(-)(+)HMDA                                           | 1                  | -                     |
| 700          | 701             | 272 + 288 + 2 + 116 + 23           | [F-C(-)(+)HMDA] <sub>2</sub> (-)(+)Na                   | 1                  | -                     |
| 719          | 717             | 288 + 288 + 2 + 116 + 23           | [C-C(-)(+)HMDA] <sub>2</sub> (-)(+)Na                   | 1                  | -                     |
| 723          | 723             | 272 + 272 + 2 + 114 + 115 – 17 × 3 | F-HMDA-F-HMDA                                           | -                  | 3                     |
| 759          | 758             | 272 + 288 + 2 + 115 × 2 – 17 × 2   | HMDA-F-C-HMDA                                           | -                  | 2                     |
| 761          | 760             | 274 + 290 + 114 – 17 × 2 + 116     | F-HMDA-C(-)(+)HMDA                                      | 1                  | 2                     |
| 761          | 760             | 272 + 272 + 2 + 115 – 17 + 116     | HMDA-F-F(-)(+)HMDA                                      | 1                  | 1                     |
| 776          | 776             | 272 + 288 + 2 + 114 × 2 – 17       | HMDA-F-C(-)(+)HMDA                                      | 1                  | 1                     |
| 857          | 857             | 272 + 272 + 288 + 2 + 23           | Trimer                                                  | -                  | -                     |
| 1069         | 1070            | 857 + 115 × 2 – 17                 | [HMDA-(F-C-F)(-)(+)HMDA] <sub>2</sub> (-)(+)Na          | 1                  | 1                     |

The same period of 40 Da from 801 until 350 is observed.

sAB100

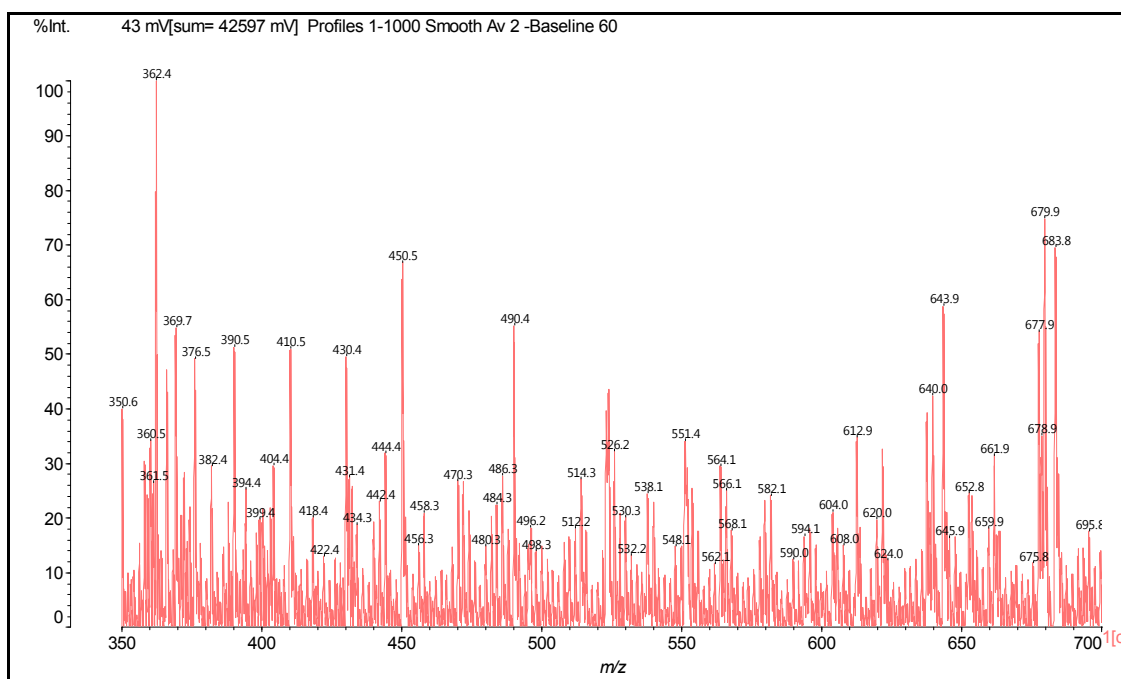

**Figure S4.** MALDI ToF spectrum of the uncatalysed reaction of mimosa + hexamethylenediamine at 100 °C; 350–700Da range.

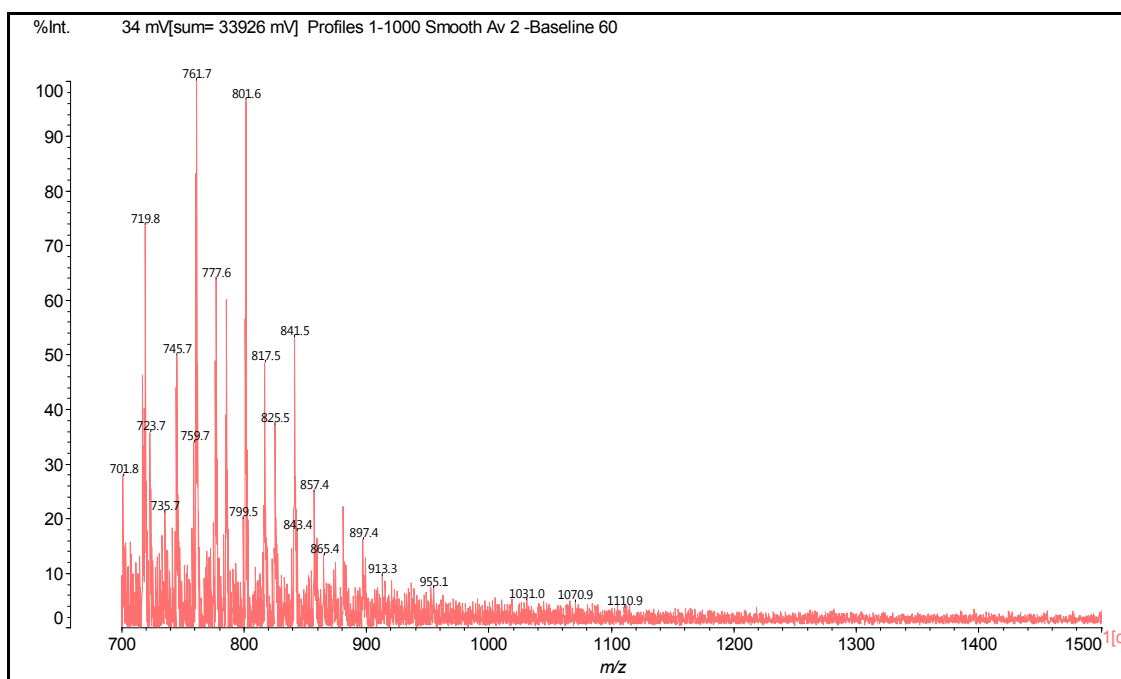

**Figure S5.** MALDI ToF spectrum of the uncatalysed reaction of mimosa + hexamethylenediamine at 100 °C; 700–1500 Da range.

In the three next samples, which were prepared at 65 °C, have also been found the same period of 40 Da, from 801 Da until 350 Da.

## B65

**Table S4.** Structures determined by MALDI ToF of the reaction of mimosa + hexamethylenediamine + NaOH at 65 °C.

| Experimental | Calculated (Da) | Descrip. Cal (Da)                     | Description                                    | Number Ionic Bonds | Number Covalent Bonds |
|--------------|-----------------|---------------------------------------|------------------------------------------------|--------------------|-----------------------|
| 372          | 372             | 274 + 116 – 18                        | F-HMDA                                         | -                  | 1                     |
| 390          | 390             | 274 + 116                             | F(-)(+)HMDA                                    | 1                  | -                     |
| 445          | 444             | 306 + 115 + 23                        | G(-)(+)HMDA(-)(+)Na                            | 1                  | -                     |
| 488          | 488             | 274 – 17 + 115 + 116                  | HMDA(+)(-)F-HMDA                               | 1                  | 1                     |
| 466          | 468             | 274 + 114 × 2 – 17 × 2                | (HMDA-F-HMDA) less 2H+                         | -                  | 2                     |
| 485          | 484             | 290 + 114 × 2 – 17 × 2                | (HMDA-C-HMDA) + 2H+                            | -                  | 2                     |
| 502          | 502             | 274 + 114 + 114                       | F[(-)(+)HMDA] <sub>2</sub> less 2H+            | 2                  | -                     |
| 507          | 507             | 290 + 115 + 114 –<br>17 × 2 + 23      | [C(HMDA) <sub>2</sub> ](+)(-)Na                | -                  | 2                     |
| 523          | 524             | 306 + 114 + 115 –<br>17 – 17 + 23     | (G[HMDA] <sub>2</sub> )(-)(+)Na                | -                  | 2                     |
| 526          | 525             | 290 + 114 + 115 – 17 + 23             | HMDA-C(-)(+)HMDA(-)(+)Na                       | 1                  | 1                     |
| 542          | 542             | 306 + 115 × 2 – 17 + 23               | [HMDA(+)(-)G-HMDA](-)(+)Na                     | 1                  | 1                     |
| 563          | 562             | 272 + 288 + 2                         | Dimer                                          | -                  | -                     |
| 563          | 564             | 306 + 114 + 115 – 17 + 23<br>× 2      | Na(+)(-)HMDA(+)(-)G-HMDA(-)(+)Na               | 1                  | 1                     |
| 578          | 578             | 288 + 288 + 2                         | Dimer                                          | -                  | -                     |
| 612          | 610             | 304 + 304 + 2                         | Dimer                                          | -                  | -                     |
| 619          | 618             | 306 + 115 × 2 – 17 × 2 +<br>116       | HMDA(+)(-)G(HMDA) <sub>2</sub>                 | 1                  | 2                     |
| 622          | 622             | 306 + 115 × 2 + 114 – 17 ×<br>3 + 23  | [G(HMDA) <sub>2</sub> ](-)(+)Na                | -                  | 3                     |
| 643          | 644             | 272 + 114 × 3 + 2 + 23                | -                                              | 3                  | -                     |
| 643          | 644             | 272 + 272 + 2 + 114 – 17              | F-F-HMDA                                       | -                  | 1                     |
| 643          | 642             | 272 + 288 + 2 + 114 – 17 × 2          | F-HMDA-C                                       | -                  | 2                     |
| 652          | 654             | 306 + 116 × 3                         | G[(-)(+)HMDA] <sub>3</sub>                     | 3                  | -                     |
| 661          | 660             | 272 + 288 + 2 + 115 – 17              | F-C-HMDA                                       | -                  | 1                     |
| 661          | 662             | 272 + 272 + 2 + 116                   | F-F(-)(+)HMDA                                  | 1                  | -                     |
| 677          | 676             | 306 + 116 × 2 + 115 + 23              | [HMDA(+)(-)] <sub>2</sub> G (-)(+)HMDA(-)(+)Na | 3                  | -                     |
| 678          | 678             | 272 + 288 + 2 + 116                   | F-C(-)(+)HMDA                                  | 1                  | -                     |
| 683          | 682             | 272 + 288 + 2 + 114 – 17 + 23         | [F-C-HMDA]                                     | -                  | 1                     |
| 693          | 694             | 288 + 288 + 2 + 116                   | C-C(-)(+)HMDA                                  | 1                  | -                     |
| 700          | 701             | 272 + 288 + 2 + 116 + 23              | [F-C(-)(+)HMDA](-)(+)Na                        | 1                  | -                     |
| 719          | 717             | 288 + 288 + 2 + 116 + 23              | [C-C(-)(+)HMDA](-)(+)Na                        | 1                  | -                     |
| 723          | 723             | 272 + 272 + 2 + 114 + 115<br>– 17 × 3 | F-HMDA-F-HMDA                                  | -                  | 3                     |
| 759          | 758             | 272 + 288 + 2 + 115 × 2 –<br>17 × 2   | HMDA-F-C-HMDA                                  | -                  | 2                     |
| 761          | 760             | 274 + 290 + 114 – 17 × 2 +<br>116     | F-HMDA-C(-)(+)HMDA                             | 1                  | 2                     |
| 761          | 760             | 272 + 272 + 2 + 115 – 17 +<br>116     | HMDA-F-F(-)(+)HMDA                             | 1                  | 1                     |
| 776          | 776             | 272 + 288 + 2 + 114 × 2 – 17          | HMDA-F-C(-)(+)HMDA                             | 1                  | 1                     |
| 857          | 857             | 272 + 272 + 288 + 2 + 23              | Trimer                                         | -                  | -                     |
| 865          | 866             | 272 + 288 + 304 + 2                   | Trimer                                         | -                  | -                     |
| 908          | 905             | 288 × 2 + 304 + 2 + 23                | Trimer                                         | -                  | -                     |

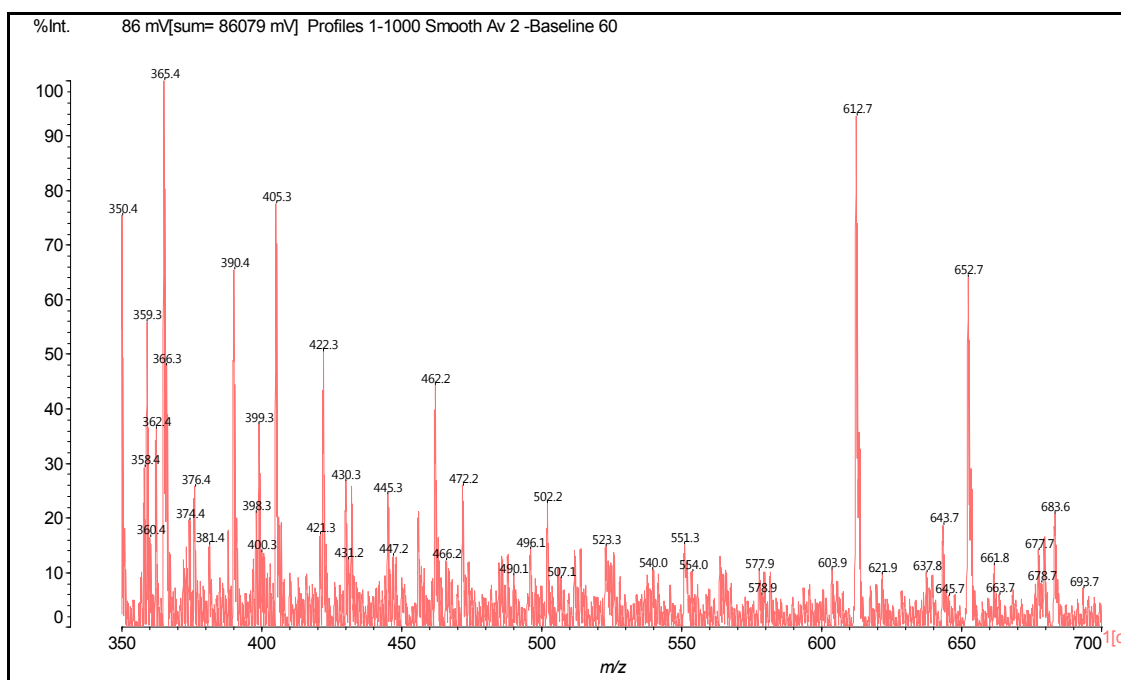

**Figure S6.** MALDI ToF spectrum of the reaction of mimosa + hexamethylenediamine + NaOH at 65 °C; 350–700 Da range.

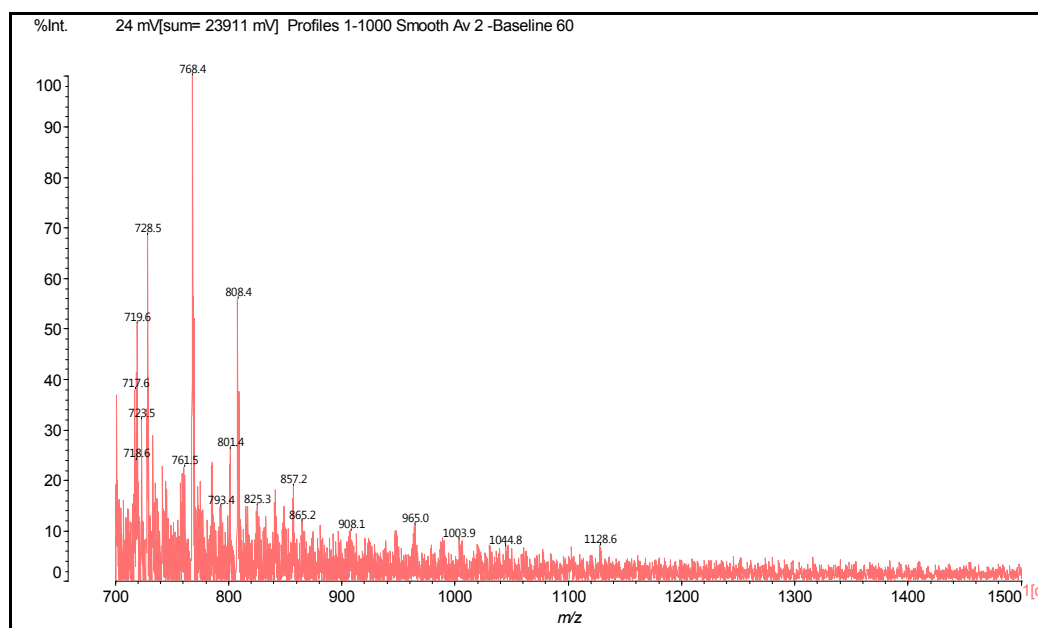

**Figure S7.** MALDI ToF spectrum of the reaction of mimosa + hexamethylenediamine + NaOH at 65 °C; 700–1500 Da range.

**A65**

**Table S5.** Structures determined by MALDI ToF of the reaction of mimosa + hexamethylenediamine + pTSA at 65 °C.

| Experimental | Calculated (Da) | Descrip. Cal (Da)   | Description         | Number Ionic Bonds | Number Covalent Bonds |
|--------------|-----------------|---------------------|---------------------|--------------------|-----------------------|
| 372          | 372             | 274 + 116 – 18      | F-HMDA              | -                  | 1                     |
| 390          | 390             | 274 + 116           | F(-)(+)HMDA         | 1                  | -                     |
| 410          | 410             | 290 – 17 + 114 + 23 | F-HMDA(-)(+)Na      | -                  | 1                     |
| 412          | 412             | 274 + 115 + 23      | F(-)(+)HMDA(-)(+)Na | 1                  | -                     |
| 428          | 428             | 290 + 115 + 23      | C(-)(+)HMDA(-)(+)Na | 1                  | -                     |



|         |     |                                       |                                                                         |   |   |
|---------|-----|---------------------------------------|-------------------------------------------------------------------------|---|---|
| 446     | 444 | 306 + 115 + 23                        | G(-)(+)HMDA(-)(+)Na                                                     | 1 | - |
| 488     | 488 | 274 - 17 + 115 + 116                  | HMDA(+)(-)F-HMDA                                                        | 1 | 1 |
| 486     | 486 | 290 + 115 × 2 - 17 × 2                | (HMDA-C-HMDA)                                                           | - | 2 |
| 501     | 500 | 304 + 2 + 114 × 2<br>- 17 - 17        | (HMDA-G-HMDA) less 2H+                                                  | - | 2 |
| 526     | 524 | 306 + 114 + 115 - 17 -<br>17 + 23     | (G[HMDA] <sub>2</sub> )(-)(+)Na                                         | - | 2 |
| 526     | 525 | 290 + 114 + 115 -<br>17 + 23          | HMDA-C(-)(+)HMDA(-)(+)Na                                                | 1 | 1 |
| 540     | 542 | 306 + 115 × 2 - 17 + 23               | [HMDA(+)(-)G-HMDA] <sub>2</sub> (-)(+)Na                                | 1 | 1 |
| 568     | 568 | 274 + 115 × 3 -<br>17 - 17 - 17       | F(HMDA) <sub>3</sub>                                                    | - | 3 |
| 612     | 610 | 304 + 304 + 2                         | Dimer                                                                   | - | - |
| 623     | 622 | 306 + 115 × 2 +<br>114 - 17 × 3 + 23  | [G(HMDA) <sub>2</sub> ] <sub>2</sub> (-)(+)Na                           | - | 3 |
| 639     | 640 | 306 + 115 × 3 -<br>17 - 17 + 23       | [HMDA(+)(-)G(HMDA) <sub>2</sub> ] <sub>2</sub> (-)(+)Na                 | 1 | 2 |
| 643     | 644 | 274 + 116 × 3 + 23 - 1                | [F((-)(+)HMDA) <sub>2</sub> ] <sub>2</sub> (-)(+)Na                     | 3 | - |
| 643     | 644 | 272 + 272 + 2<br>+ 114 - 17           | F-F-HMDA                                                                | - | 1 |
| 642     | 642 | 272 + 288 + 2 +<br>114 - 17 × 2       | F-HMDA-C                                                                | - | 2 |
| 655     | 654 | 306 + 116 × 3                         | G[(-)(+)HMDA] <sub>3</sub>                                              | 3 | - |
| 659     | 658 | 306 + 116 × 3 - 18 + 23<br>- 1        | [HMDA-G((-)(+)HMDA) <sub>2</sub> ] <sub>2</sub> (-)(+)Na                | 2 | 1 |
| 659     | 660 | 272 + 288 + 2 +<br>115 - 17           | F-C-HMDA                                                                | - | 1 |
| 661     | 662 | 272 + 272 + 2 + 116                   | F-F(-)(+)HMDA                                                           | 1 | - |
| 677     | 676 | 306 + 116 × 2 +<br>115 + 23           | [HMDA(+)(-)] <sub>2</sub> G<br>(-)(+)HMDA(-)(+)Na                       | 3 | - |
| 679     | 678 | 272 + 288 + 2 + 116                   | F-C(-)(+)HMDA                                                           | 1 | - |
| 682     | 682 | 272 + 288 + 2 +<br>114 - 17 + 23      | [F-C-HMDA]                                                              | - | 1 |
| 695     | 694 | 288 + 288 + 2 + 116                   | C-C(-)(+)HMDA                                                           | 1 | - |
| 723     | 723 | 272 + 272 + 2 + 114 +<br>115 - 17 × 3 | F-HMDA-F-HMDA                                                           | - | 3 |
| 723     | 724 | 274 + 116 × 4 - 18 × 2<br>+ 23 - 1    | [(HMDA) <sub>2</sub> F((-)(+)HMDA) <sub>2</sub> ] <sub>2</sub> (-)(+)Na | 2 | 2 |
| 745     | 744 | 274 + 274 + 114 + 116<br>- 17 × 2     | F-HMDA-F(-)(+)HMDA                                                      | - | - |
| 740-743 | 742 | 274 + 274 + 2 + 115 × 2<br>- 17 × 2   | HMDA-F-F-HMDA                                                           | - | 2 |
| 759     | 758 | 272 + 288 + 2 + 115 × 2<br>- 17 × 2   | HMDA-F-C-HMDA                                                           | - | 2 |
| 761     | 760 | 274 + 290 + 114 - 17 ×<br>2 + 116     | F-HMDA-C(-)(+)HMDA                                                      | 1 | 2 |
| 761     | 760 | 272 + 272 + 2 + 115 -<br>17 + 116     | HMDA-F-F(-)(+)HMDA                                                      | 1 | 1 |
| 777     | 776 | 272 + 288 + 2 + 115 -<br>17 + 116     | HMDA-F-C(-)(+)HMDA                                                      | 1 | 1 |
| 857     | 857 | 272 + 272 + 288 + 2 +<br>23           | Trimer                                                                  | - | - |
| 865     | 866 | 272 + 288 + 304 + 2                   | Trimer                                                                  | - | - |
| 897     | 898 | 272 × 2 + 2 + 114 × 3 -<br>17 + 23    | [(HMDA(+)(-)) <sub>2</sub> F-F-HMDA] <sub>2</sub> (-)(+)Na              | 2 | 1 |
| 897     | 898 | 288 + 304 × 2 + 2                     | Trimer                                                                  | - | - |
| 906     | 905 | 288 × 2 + 304 + 2 + 23                | Trimer                                                                  | - | - |
| 925     | 921 | 288 + 304 × 2 + 2 + 23                | Trimer                                                                  | - | - |

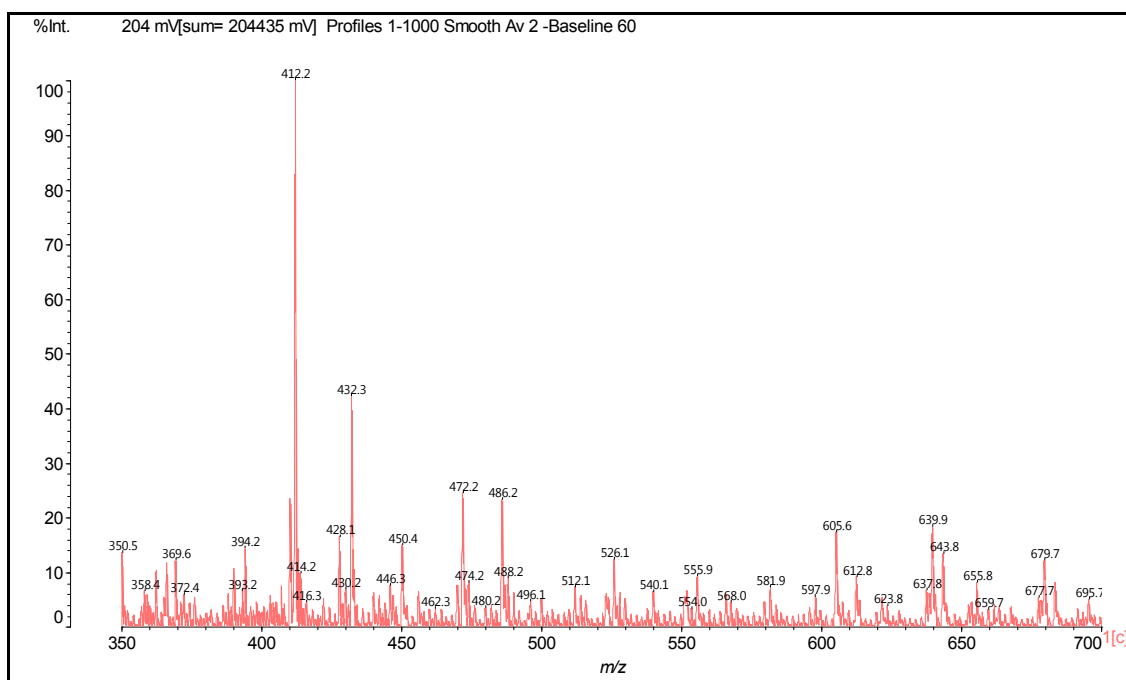

**Figure S8.** MALDI ToF spectrum of the reaction of mimosa + hexamethylenediamine + pTSA at 65 °C; 350–700 Da range.

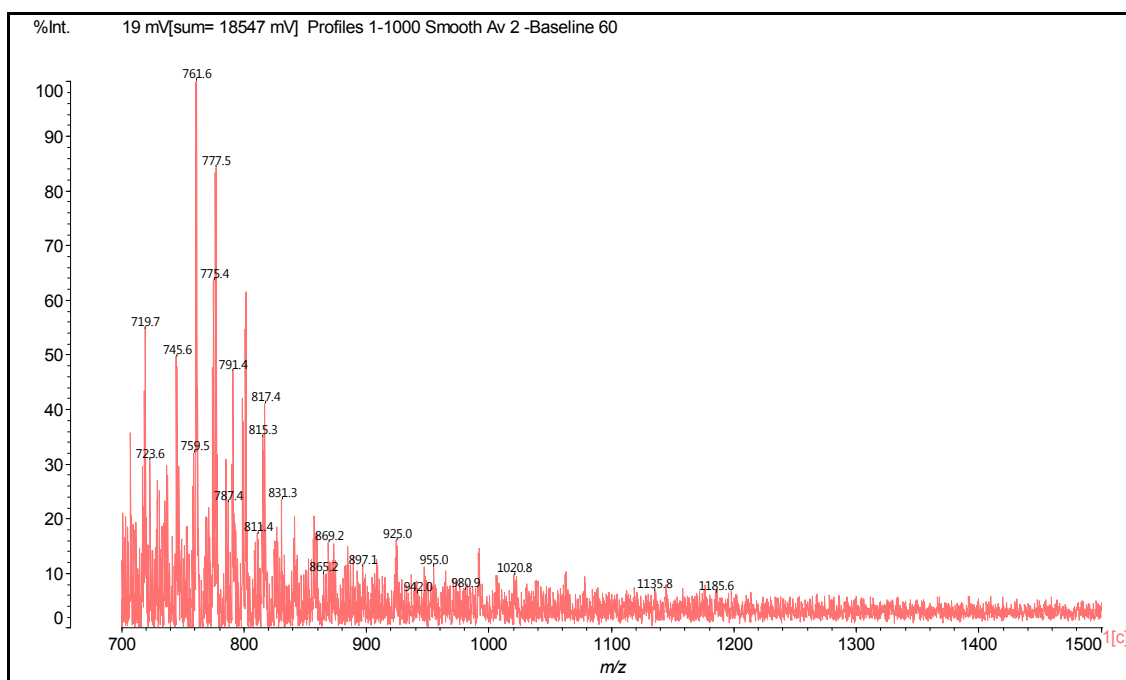

**Figure S9.** MALDI ToF spectrum of the reaction of mimosa + hexamethylenediamine + pTSA at 65 °C; 700–1500 Da range.

## sAB65

**Table S6.** Structures determined by MALDI ToF of the uncatalysed reaction of mimosa + hexamethylenediamine at 65 °C.

| Experimental | Calculated (Da) | Descrip. Cal (Da)                                                            | Description                                               | Number Ionic Bonds | Number Covalent Bonds |
|--------------|-----------------|------------------------------------------------------------------------------|-----------------------------------------------------------|--------------------|-----------------------|
| 390          | 390             | 274 + 116                                                                    | F(-)(+)HMDA                                               | 1                  | -                     |
| 410          | 410             | 290 - 17 + 114 + 23                                                          | F-HMDA(-)(+)Na                                            | -                  | 1                     |
| 444          | 444             | 306 + 115 + 23                                                               | G(-)(+)HMDA(-)(+)Na                                       | 1                  | -                     |
| 488          | 488             | 274 - 17 + 115 + 116                                                         | HMDA(+)(-)F-HMDA                                          | 1                  | 1                     |
| 468          | 468             | 274 + 114 × 2 - 17 × 2                                                       | (HMDA-F-HMDA) less 2H+                                    | -                  | 2                     |
| 486          | 486             | 290 + 115 × 2 - 17 × 2                                                       | (HMDA-C-HMDA)                                             | -                  | 2                     |
| 508          | 508             | 290 + 115 × 2 - 17 × 2 + 23 - 1                                              | [C(HMDA) <sub>2</sub> ](-)(+)Na                           | -                  | 2                     |
| 524          | 524             | 306 + 114 + 115 - 17 - 17 + 23 - 1                                           | (G[HMDA] <sub>2</sub> )(-)(+)Na                           | -                  | 2                     |
| 526          | 525             | 290 + 114 + 115 - 17 + 23                                                    | HMDA-C(-)(+)HMDA(-)(+)Na                                  | 1                  | 1                     |
| 528          | 528             | 274 + 116 + 114 + 23                                                         | HMDA(+)(-)F(-)(+)HMDA(-)(+)Na                             | 2                  | -                     |
| 560          | 560             | 306 + 116 × 2 + 23 - 1                                                       | [G((-)(+)HMDA) <sub>2</sub> ](-)(+)Na                     | 2                  | -                     |
| 566          | 568             | 274 + 115 × 3 - 17 - 17 - 17                                                 | F(HMDA) <sub>3</sub>                                      | -                  | 3                     |
| 580          | 578             | 288 + 288 + 2                                                                | Dimer                                                     | -                  | -                     |
| 612          | 610             | 304 + 304 + 2                                                                | Dimer                                                     | -                  | -                     |
| 619          | 618             | 306 + 115 × 2 - 17 × 2 + 116                                                 | HMDA(+)(-)G(HMDA) <sub>2</sub>                            | 1                  | 2                     |
| 621          | 622             | 306 + 115 × 2 + 114 - 17 × 3 + 23                                            | [G(HMDA) <sub>3</sub> ](-)(+)Na                           | -                  | 3                     |
| 639          | 640             | 306 + 115 × 3 - 17 - 17 + 23                                                 | [HMDA(+)(-)G(HMDA) <sub>2</sub> ](-)(+)Na                 | 1                  | 2                     |
| 643          | 644             | 274 + 116 × 3 + 23 - 1                                                       | [F((-)(+)HMDA) <sub>3</sub> ](-)(+)Na                     | 3                  | -                     |
| 643          | 644             | 272 + 272 + 2 + 114 - 17                                                     | F-F-HMDA                                                  | -                  | 1                     |
| 642          | 642             | 272 + 288 + 2 + 114 - 17 × 2                                                 | F-HMDA-C                                                  | -                  | 2                     |
| 653          | 654             | 306 + 116 × 3                                                                | G[(-)(+)HMDA] <sub>3</sub>                                | 3                  | -                     |
| 661          | 660             | 272 + 288 + 2 + 115 - 17                                                     | F-C-HMDA                                                  | -                  | 1                     |
| 661          | 662             | 272 + 272 + 2 + 116                                                          | F-F(-)(+)HMDA                                             | 1                  | -                     |
| 677          | 676             | 306 + 116 × 2 + 115 + 23                                                     | [HMDA(+)(-)] <sub>2</sub> G(-)(+)HMDA(-)(+)Na             | 3                  | -                     |
| 679          | 678             | 272 + 288 + 2 + 116                                                          | F-C(-)(+)HMDA                                             | 1                  | -                     |
| 683          | 682             | 272 + 288 + 2 + 114 - 17 + 23                                                | [F-C-HMDA]                                                | -                  | 1                     |
| 695          | 694             | 288 + 288 + 2 + 116                                                          | C-C(-)(+)HMDA                                             | 1                  | -                     |
| 719          | 717             | 288 + 288 + 2 + 116 + 23                                                     | [C-C(-)(+)HMDA](-)(+)Na                                   | 1                  | -                     |
| 723          | 723             | 272 + 272 + 2 + 114 + 115 - 17 × 3                                           | F-HMDA-F-HMDA                                             | -                  | 3                     |
| 723          | 724             | 274 + 116 × 4 - 18 × 2 + 23 - 1                                              | [(HMDA) <sub>2</sub> F((-)(+)HMDA) <sub>2</sub> ](-)(+)Na | 2                  | 2                     |
| 759          | 758             | 272 + 288 + 2 + 115 × 2 - 17 × 2                                             | HMDA-F-C-HMDA                                             | -                  | 2                     |
| 761          | 760             | 274 + 290 + 114 - 17 × 2 + 116                                               | F-HMDA-C(-)(+)HMDA                                        | 1                  | 2                     |
| 761          | 760             | 272 + 272 + 2 + 115 - 17 + 116                                               | HMDA-F-F(-)(+)HMDA                                        | 1                  | 1                     |
| 777          | 776             | 272 + 288 + 2 + 115 - 17 + 116                                               | HMDA-F-C(-)(+)HMDA                                        | 1                  | 1                     |
| 857          | 857             | 272 + 272 + 288 + 2 + 23                                                     | Trimer                                                    | -                  | -                     |
| 1366         | 1368            | 288 × 2 + 2 + 116 × 2 - 18 × 3 + 304 × 2 + 2 (Or 288 × 4 + 2 + 116 × 2 - 18) | C-G-HMDA-C-G-HMDA or HMDA-C-C-C-C(-)(+)HMDA               | -                  | 3                     |
| 1480         | 1482            | 288 × 2 + 304 × 2 + 2 + 116 × 3 - 18 × 3                                     | (G-C-C-G)(HMDA) <sub>3</sub>                              | -                  | 3                     |

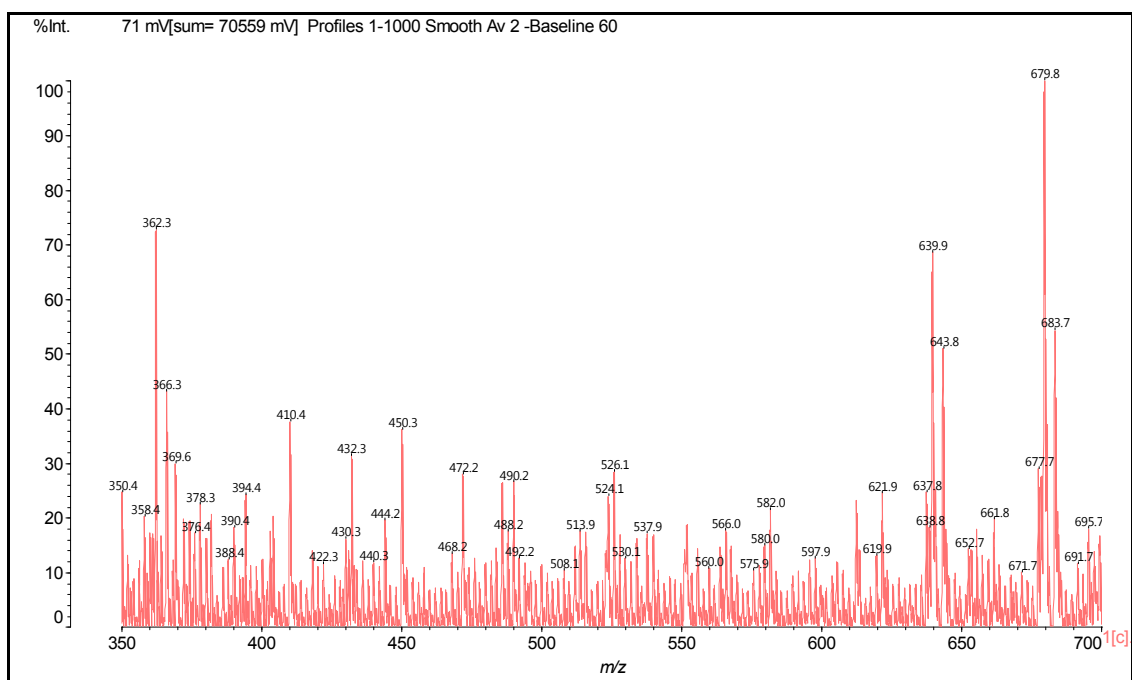

**Figure S10.** MALDI ToF spectrum of the uncatalysed reaction of mimosa + hexamethylenediamine at 65 °C; 350–700 Da range.

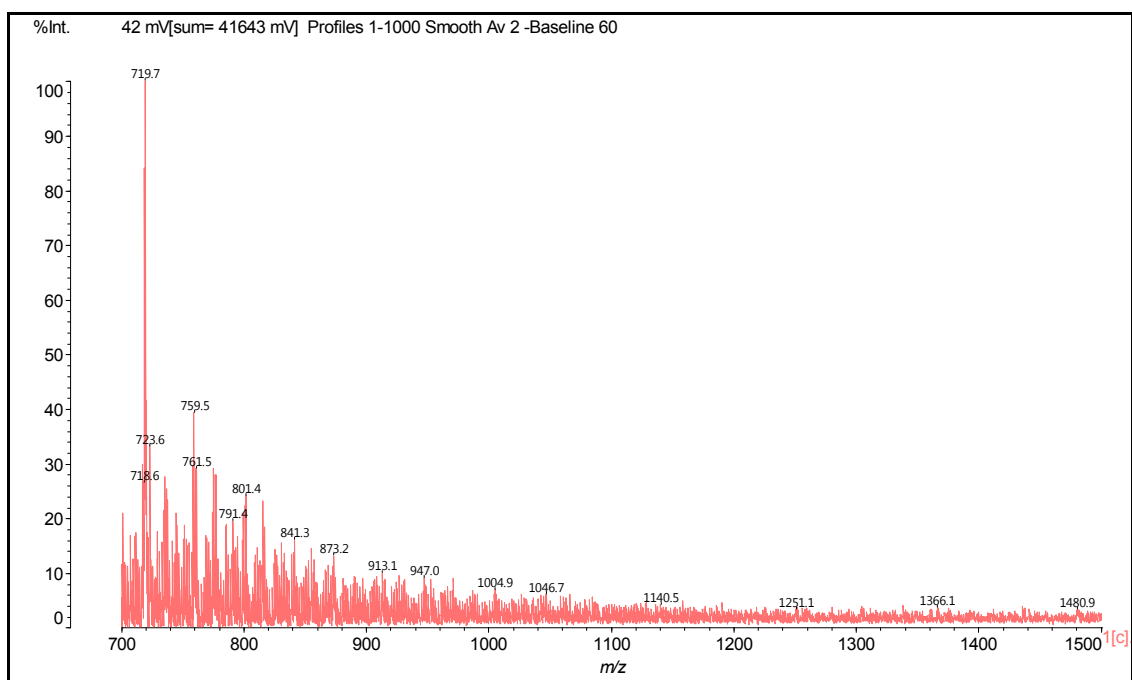

**Figure S11.** MALDI ToF spectrum of the uncatalysed reaction of mimosa + hexamethylenediamine at 65 °C; 700–1500 Da range.

## 2. Catechin Model Compound Reactions

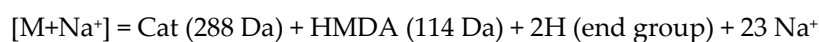

Cat = catechin

HMDA = hexamethylenediamine

### sAB185

**Table S7.** Structures determined by MALDI ToF of the uncatalysed reaction of catechin monomer + hexamethylenediamine at 185 °C.

| Experimental [Mn + Na <sup>+</sup> ]<br>(on the Graph) (Da) | Calculated<br>[Mn + Na <sup>+</sup> ] (Da) | Description                                                   |
|-------------------------------------------------------------|--------------------------------------------|---------------------------------------------------------------|
| 23.1                                                        | 23                                         | Na <sup>+</sup>                                               |
| 39.1                                                        | 35.5                                       | Cl <sup>-</sup>                                               |
| 117                                                         | 116                                        | HMDA                                                          |
| 137                                                         | 139                                        | HMDA + Na <sup>+</sup>                                        |
| 289.9                                                       | 290                                        | Cat                                                           |
| 315.8                                                       | 313                                        | Cat + Na <sup>+</sup>                                         |
| 370.7                                                       | 367                                        | 3× HMDA + Na <sup>+</sup>                                     |
| 401.8                                                       | 404                                        | Cat + HMDA                                                    |
| 428.8                                                       | 427                                        | Cat + HMDA + Na <sup>+</sup>                                  |
| 522.5                                                       | 518                                        | HMDA + Cat + HMDA                                             |
| 544.5                                                       | 541                                        | HMDA + Cat + HMDA + Na <sup>+</sup>                           |
| 698.6                                                       | 692                                        | Cat + HMDA + Cat                                              |
| 711.4                                                       | 709                                        | 6× HMDA + Na <sup>+</sup>                                     |
| 888.8                                                       | 889                                        | Cat + Cat + Cat + Na <sup>+</sup>                             |
| 1103.2                                                      | 1096                                       | Cat + HMDA + Cat + HMDA + Cat                                 |
| 1220.5                                                      | 1208                                       | Cat + HMDA + Cat + HMDA + Cat + HMDA                          |
| 1279.4                                                      | 1268                                       | Cat + Cat + HMDA + Cat + Cat                                  |
| 1397.6                                                      | 1405                                       | Cat + HMDA + Cat + Cat + HMDA + Cat + Na <sup>+</sup>         |
| 1454.7                                                      | 1459                                       | HMDA + Cat + HMDA + Cat + HMDA + Cat + HMDA + Na <sup>+</sup> |
| 1513.9                                                      | 1519                                       | Cat + HMDA + Cat + HMDA + Cat + HMDA + Cat + Na <sup>+</sup>  |

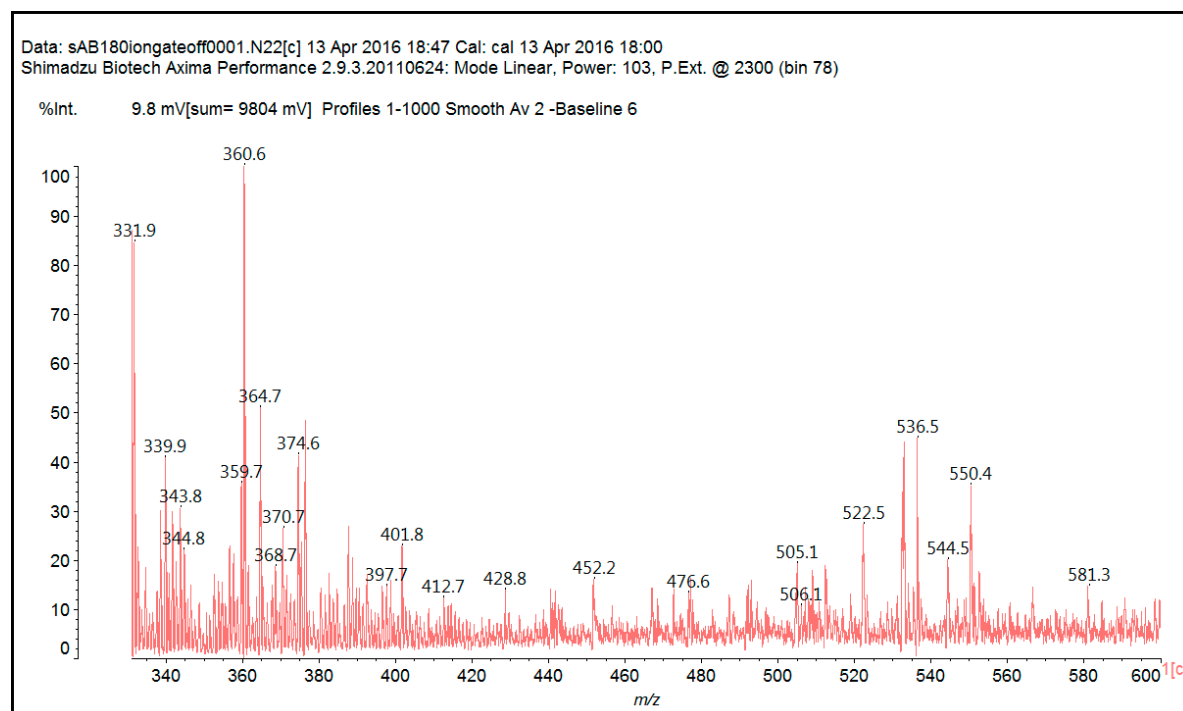

**Figure S12.** MALDI ToF of the uncatalysed reaction of catechin monomer + hexamethylenediamine at 185 °C; 330–600 Da range.

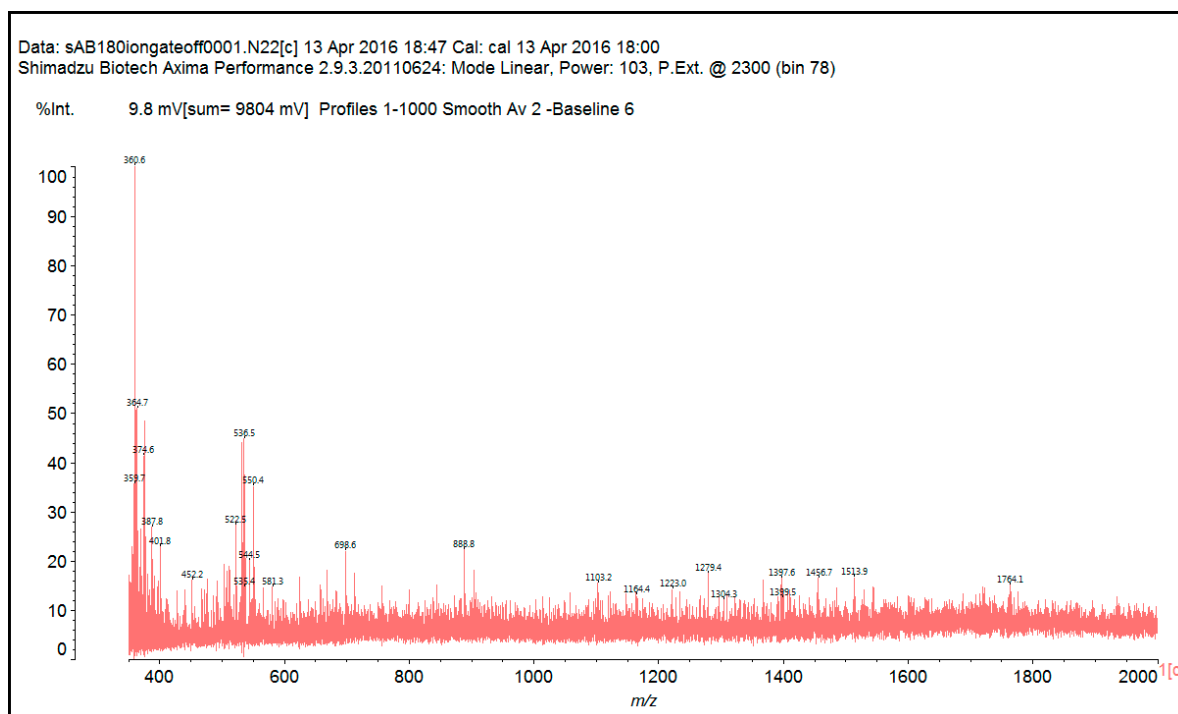

**Figure S13.** MALDI ToF of the uncatalysed reaction of catechin monomer + hexamethylenediamine at 185 °C; 350–2000 Da range.

**sAB100**

**Table S8.** Structures determined by MALDI ToF of the uncatalysed reaction of catechin monomer + hexamethylenediamine at 100 °C.

| Experimental [Mn + Na <sup>+</sup> ] (on the Graph) (Da) | Calculated [Mn + Na <sup>+</sup> ] (Da) | Description                                                                |
|----------------------------------------------------------|-----------------------------------------|----------------------------------------------------------------------------|
| 23.0                                                     | 23                                      | Na <sup>+</sup>                                                            |
| 38.9                                                     | 35.5                                    | Cl <sup>-</sup>                                                            |
| 117.2                                                    | 116                                     | HMDA                                                                       |
| 137.1                                                    | 139                                     | HMDA + Na <sup>+</sup>                                                     |
| 289.9                                                    | 290                                     | Cat                                                                        |
| 314.7                                                    | 313                                     | Cat + Na <sup>+</sup>                                                      |
| 368.6                                                    | 367                                     | 3 × HMDA + Na <sup>+</sup>                                                 |
| 424.7                                                    | 427                                     | Cat + HMDA + Na <sup>+</sup>                                               |
| 520.8                                                    | 518                                     | HMDA + Cat + HMDA                                                          |
| 540.8–546.6                                              | 541                                     | HMDA + Cat + HMDA + Na <sup>+</sup>                                        |
| 719.6                                                    | 715                                     | Cat + HMDA + Cat + Na <sup>+</sup>                                         |
| 893                                                      | 889                                     | Cat + Cat + Cat + Na <sup>+</sup>                                          |
| 1087                                                     | 1094                                    | Cat + HMDA + Cat + HMDA + Cat                                              |
| 1221.7                                                   | 1208                                    | Cat + HMDA + Cat + HMDA + Cat + HMDA                                       |
| 1338.8                                                   | 1345                                    | HMDA + Cat + HMDA + Cat + HMDA + Cat + HMDA + Na <sup>+</sup>              |
| 1397.3                                                   | 1382                                    | Cat + HMDA + Cat + Cat + HMDA + Cat                                        |
| 1455.2                                                   | 1459                                    | HMDA + Cat + HMDA + Cat + HMDA + Cat + HMDA + HMDA + Na <sup>+</sup>       |
| 1746.7                                                   | 1745                                    | HMDA + Cat + HMDA + Cat + HMDA + Cat + HMDA + Cat + HMDA + Na <sup>+</sup> |

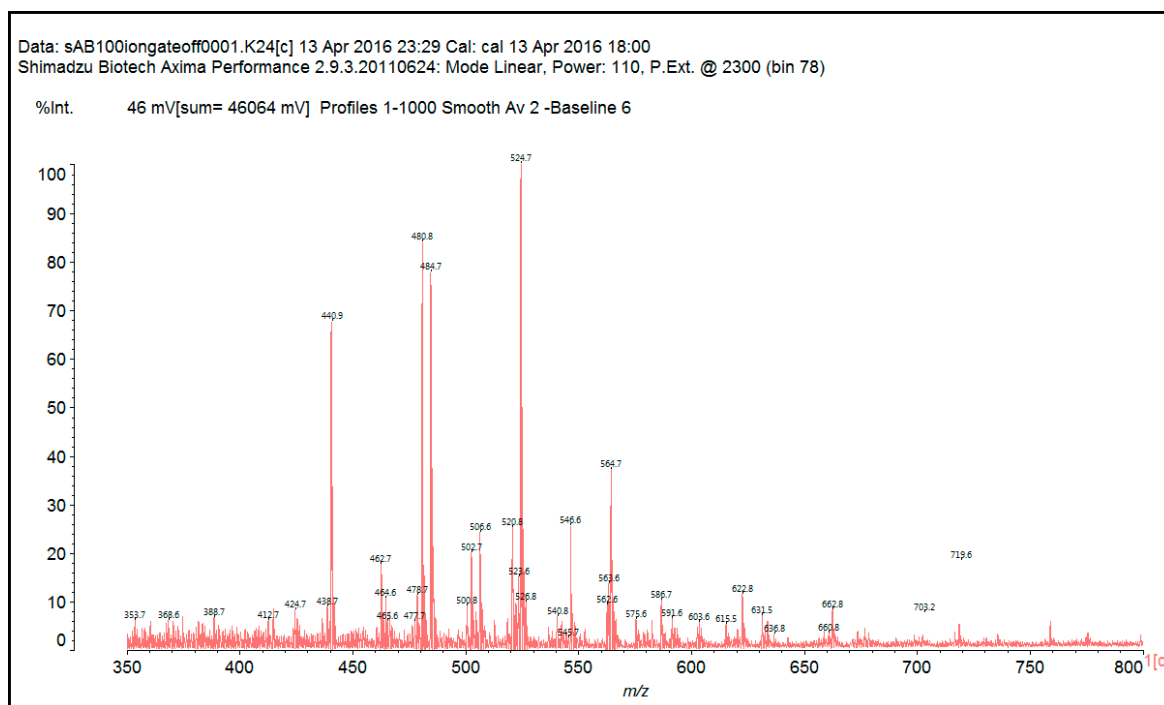

**Figure S14.** MALDI ToF spectrum of the uncatalysed reaction of catechin monomer + hexamethylenediamine at 100 °C; 350–800 Da range.

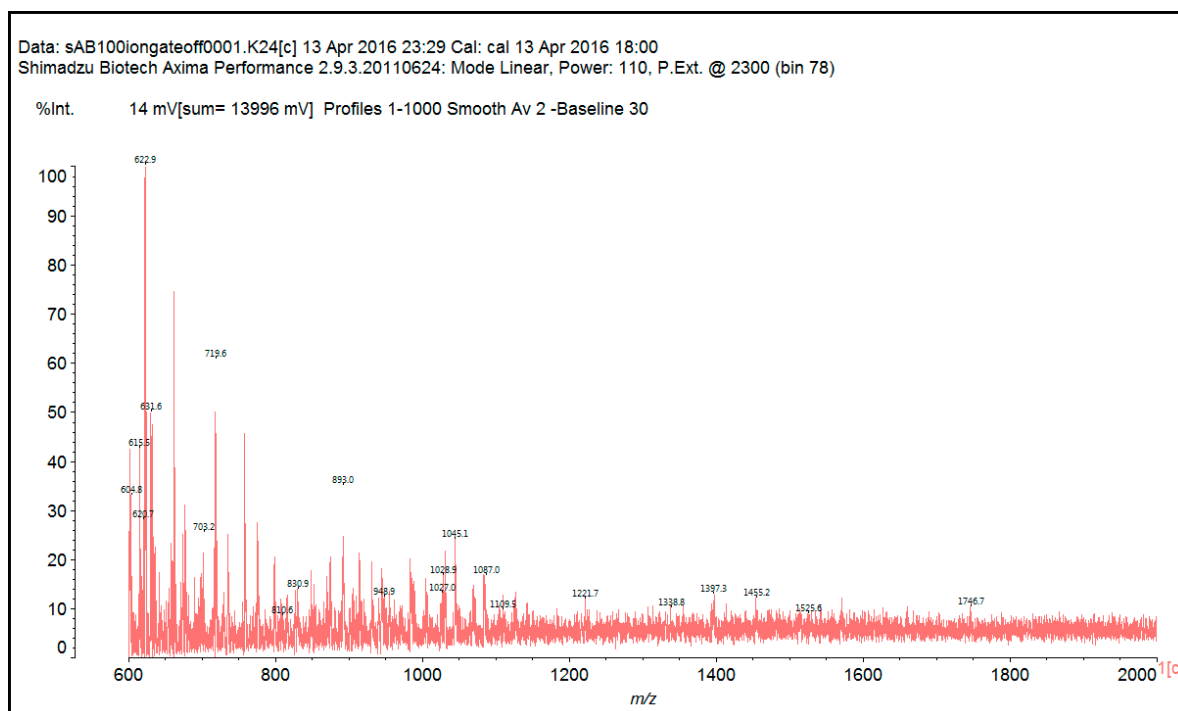

**Figure S15.** MALDI ToF spectrum of the uncatalysed reaction of catechin monomer + hexamethylenediamine at 100 °C; 600–2000 Da range.

## sAB65

**Table S9.** Structures determined by MALDI ToF of the uncatalysed reaction of catechin monomer + hexamethylenediamine at 65 °C.

| Experimental [Mn + Na <sup>+</sup> ] (on the Graph) (Da) | Calculated [Mn + Na <sup>+</sup> ] (Da) | Description                         |
|----------------------------------------------------------|-----------------------------------------|-------------------------------------|
| 23.1                                                     | 23                                      | Na <sup>+</sup>                     |
| 39.1                                                     | 35.5                                    | Cl <sup>-</sup>                     |
| 117.2                                                    | 116                                     | HMDA                                |
| 137                                                      | 139                                     | HMDA + Na <sup>+</sup>              |
| 280                                                      | 290                                     | Cat                                 |
| 317                                                      | 313                                     | Cat + Na <sup>+</sup>               |
| 344.9                                                    | 344                                     | 3 × HMDA                            |
| 368.1                                                    | 367                                     | 3 × HMDA + Na <sup>+</sup>          |
| 399.1                                                    | 404                                     | Cat + HMDA                          |
| 428.8                                                    | 427                                     | Cat + HMDA + Na <sup>+</sup>        |
| 522.9                                                    | 518                                     | HMDA + Cat + HMDA                   |
| 542.9                                                    | 541                                     | HMDA + Cat + HMDA + Na <sup>+</sup> |
| 576.9                                                    | 572                                     | 5 × HMDA                            |
| 702                                                      | 692                                     | Cat + HMDA + Cat                    |
| 811.9                                                    | 806                                     | Cat + HMDA + Cat + HMDA             |
| 895                                                      | 889                                     | Cat + Cat + Cat + Na <sup>+</sup>   |
| 919                                                      | 922                                     | HMDA + Cat + HMDA + Cat + HMDA      |
| 1033.2                                                   | 1028                                    | 9 × HMDA                            |

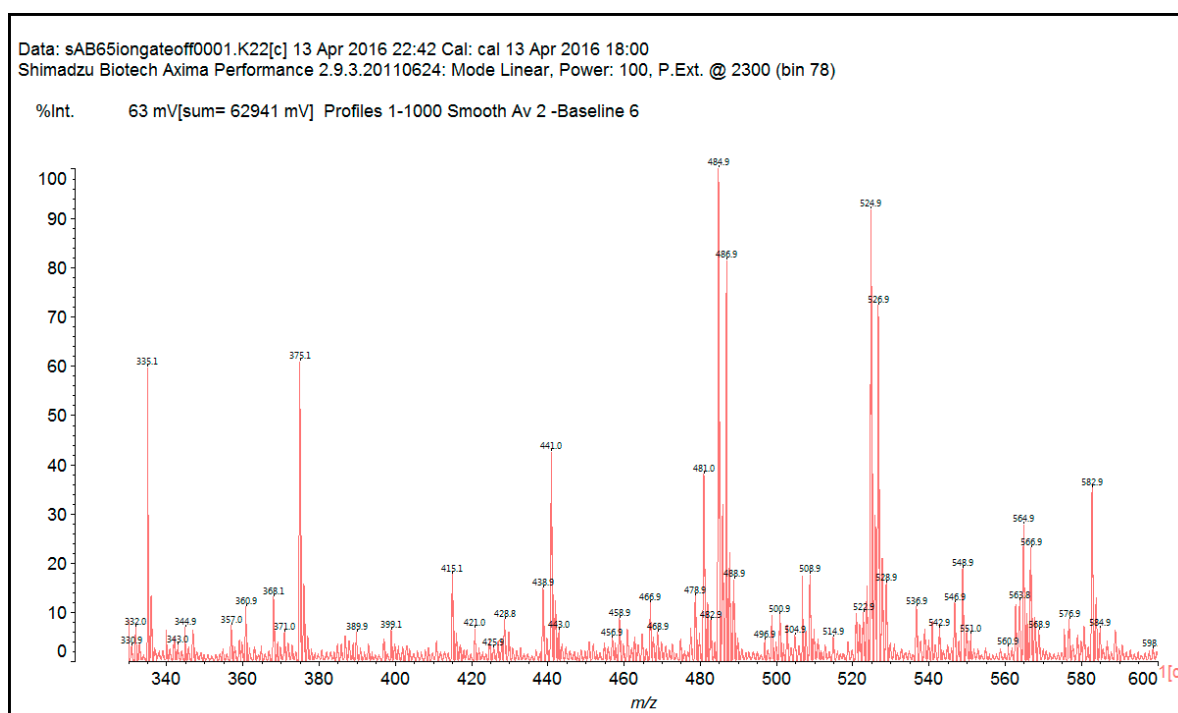**Figure S16.** MALDI ToF spectrum of the uncatalysed reaction of catechin monomer + hexamethylenediamine at 65 °C; 330–600 Da range.



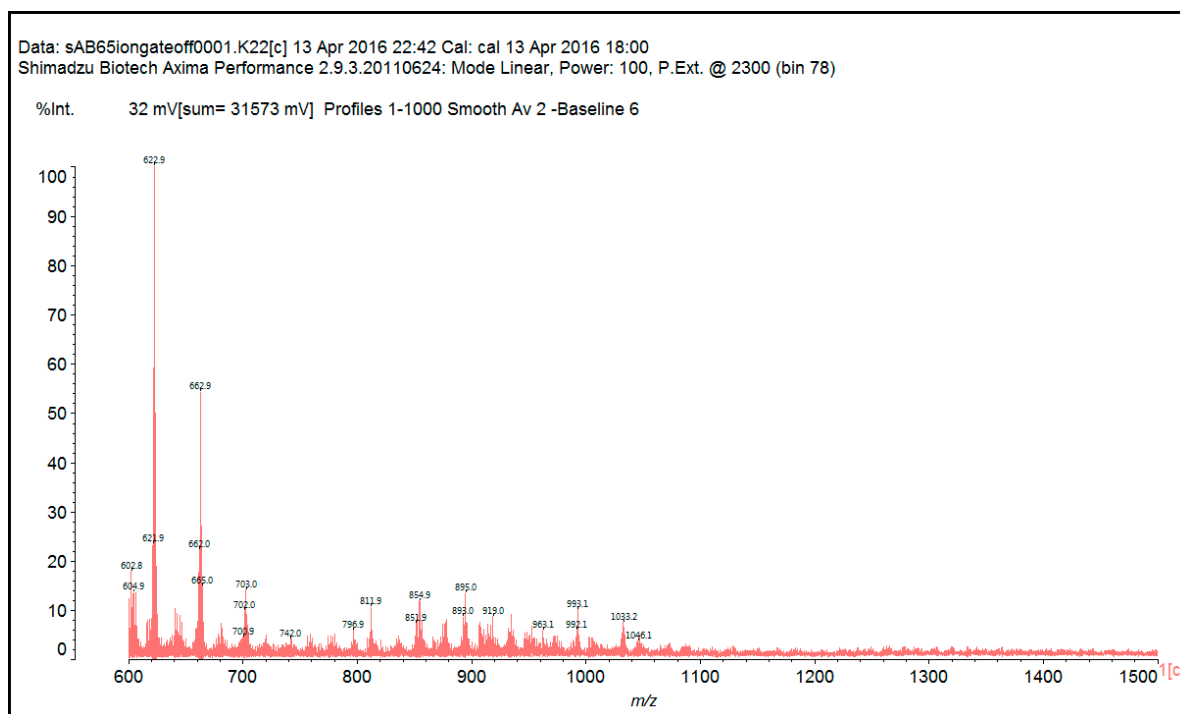

**Figure S17.** MALDI ToF spectrum of the uncatalysed reaction of catechin monomer + hexamethylenediamine at 65 °C; 600–1500 Da range.

**B180**

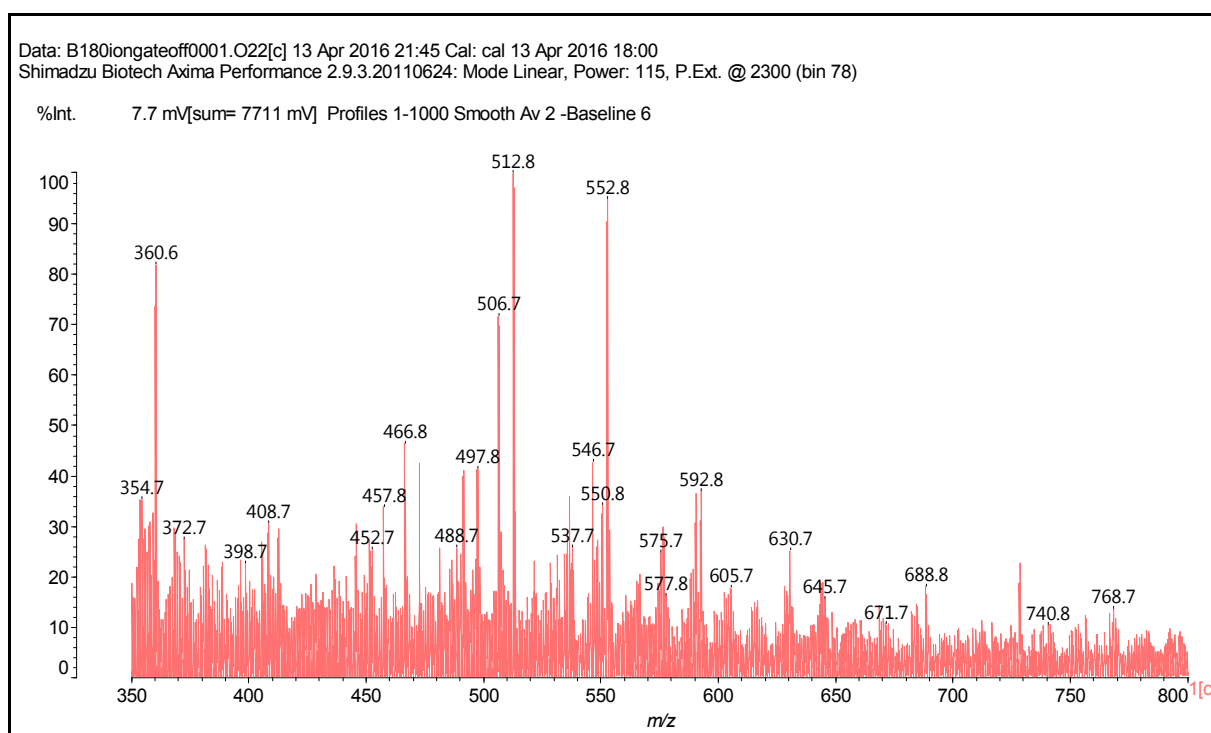

**Figure S18.** MALDI ToF spectrum of the reaction of catechin monomer + hexamethylenediamine + NaOH at 185 °C; 350–800 Da range.

**B180**

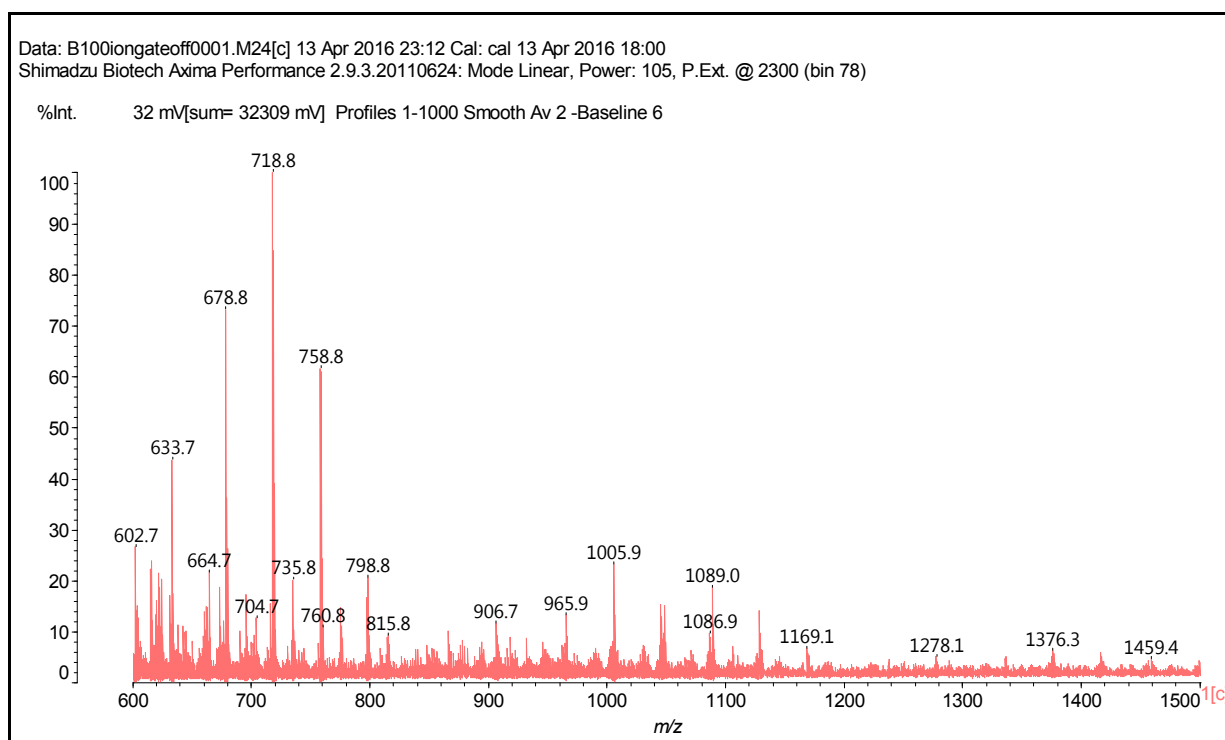

**Figure S19.** MALDI ToF spectrum of the reaction of catechin monomer + hexamethylenediamine + NaOH at 185 °C; 600-1500 Da range.

**B100**

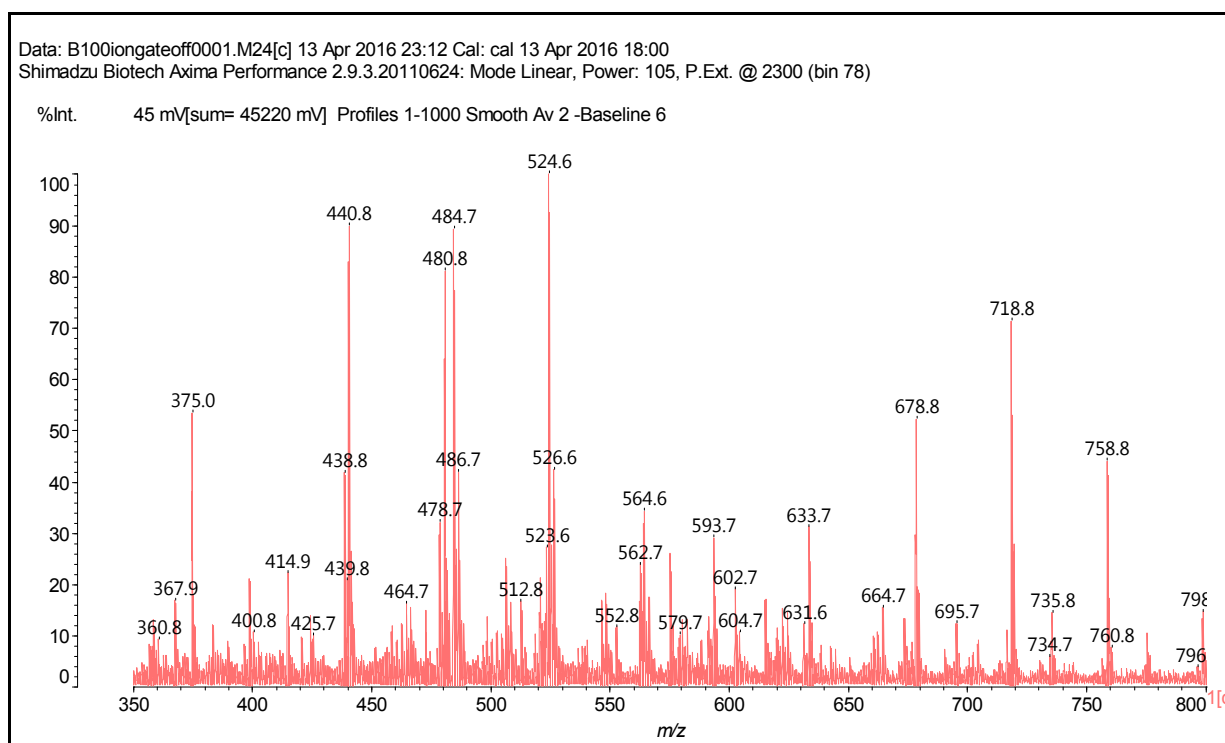

**Figure S20.** MALDI ToF spectrum of the reaction of catechin monomer + hexamethylenediamine + NaOH at 100 °C; 350-800 Da range.

**B100**

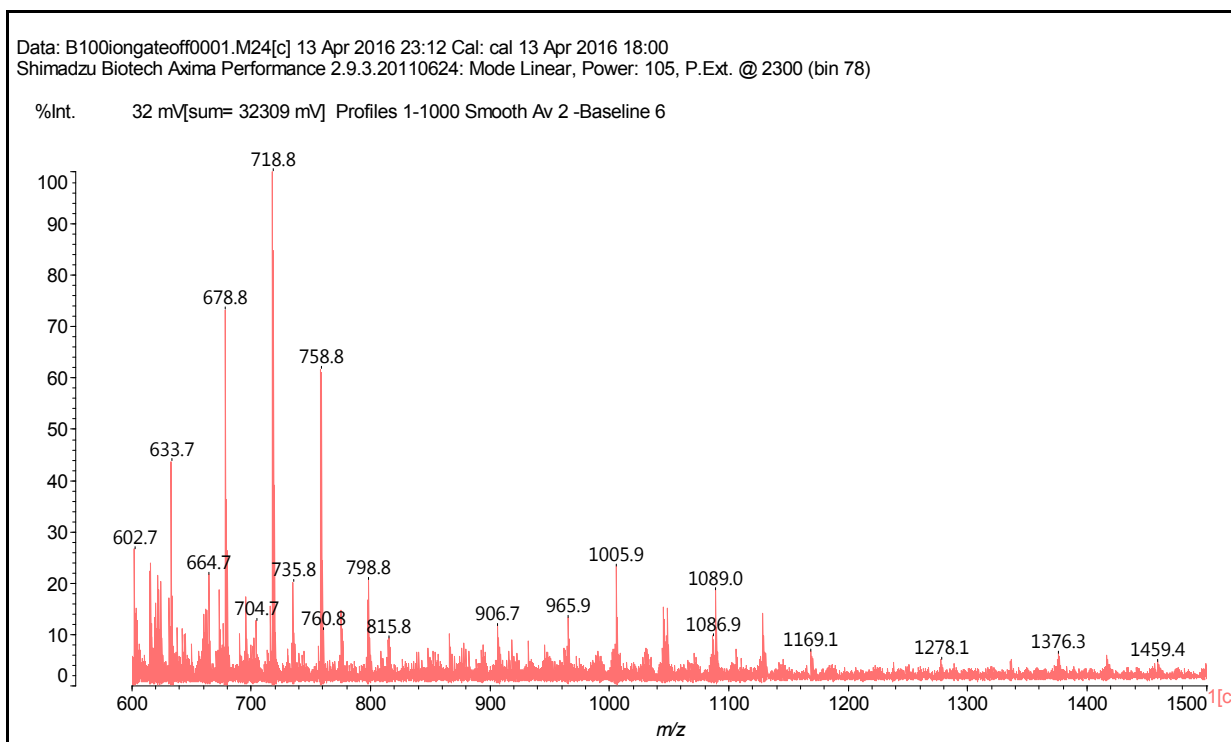

**Figure S21.** MALDI ToF spectrum of the reaction of catechin monomer + hexamethylenediamine + NaOH at 100 °C; 600 – 1500 Da range.

**B65**

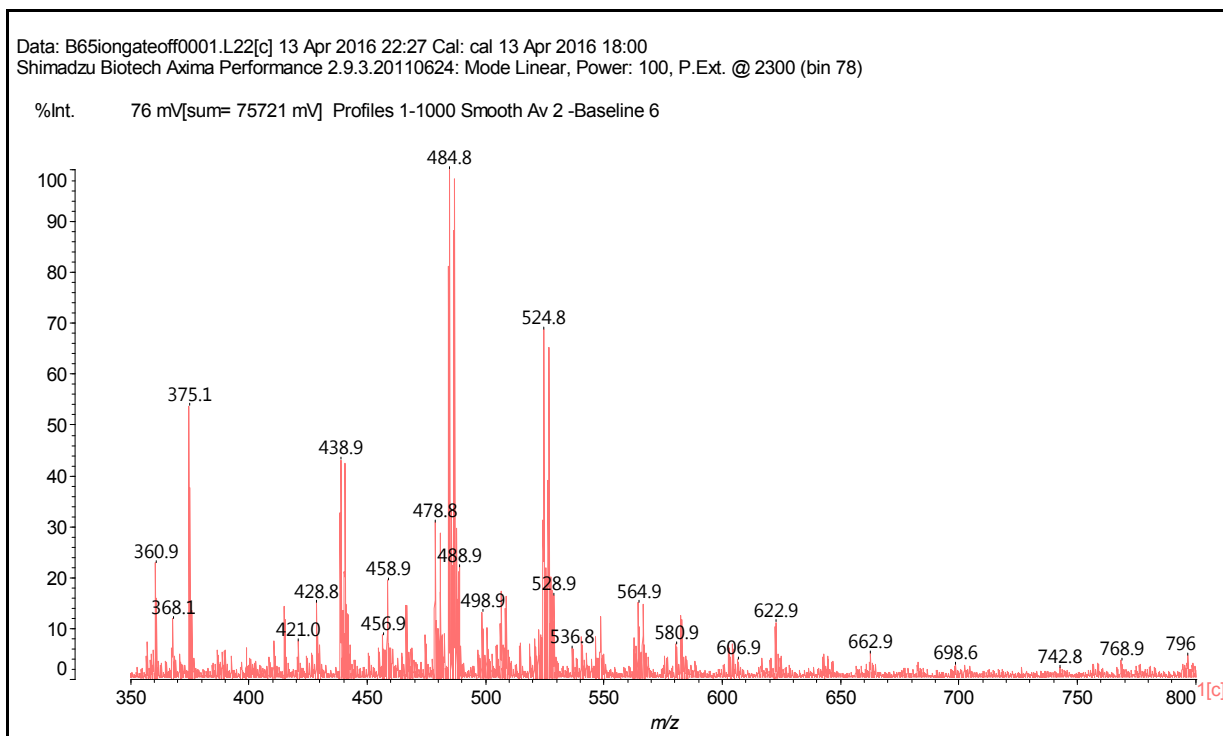

**Figure S22.** MALDI ToF spectrum of the reaction of catechin monomer + hexamethylenediamine + NaOH at 65 °C; 350–800Da range.

**B65**

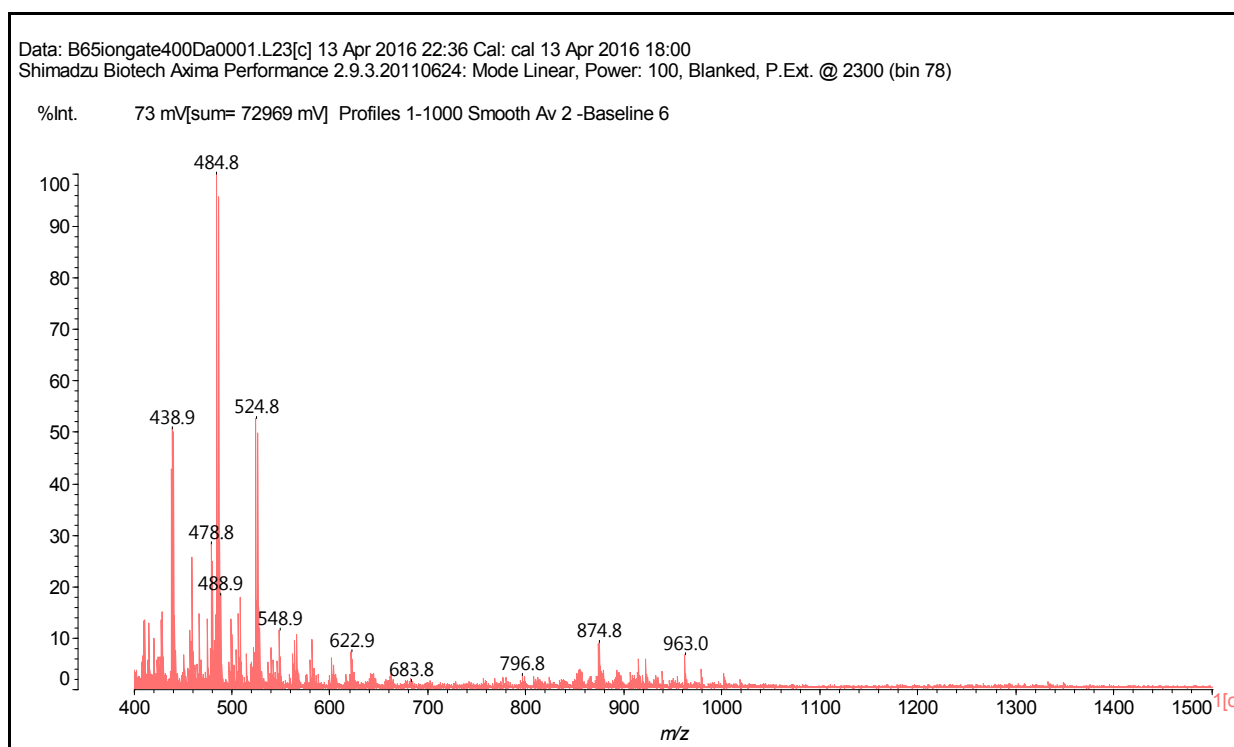

**Figure S23.** MALDI ToF spectrum of the reaction of catechin monomer + hexamethylenediamine + NaOH at 65 °C; 600–1500 Da range.

**A180**

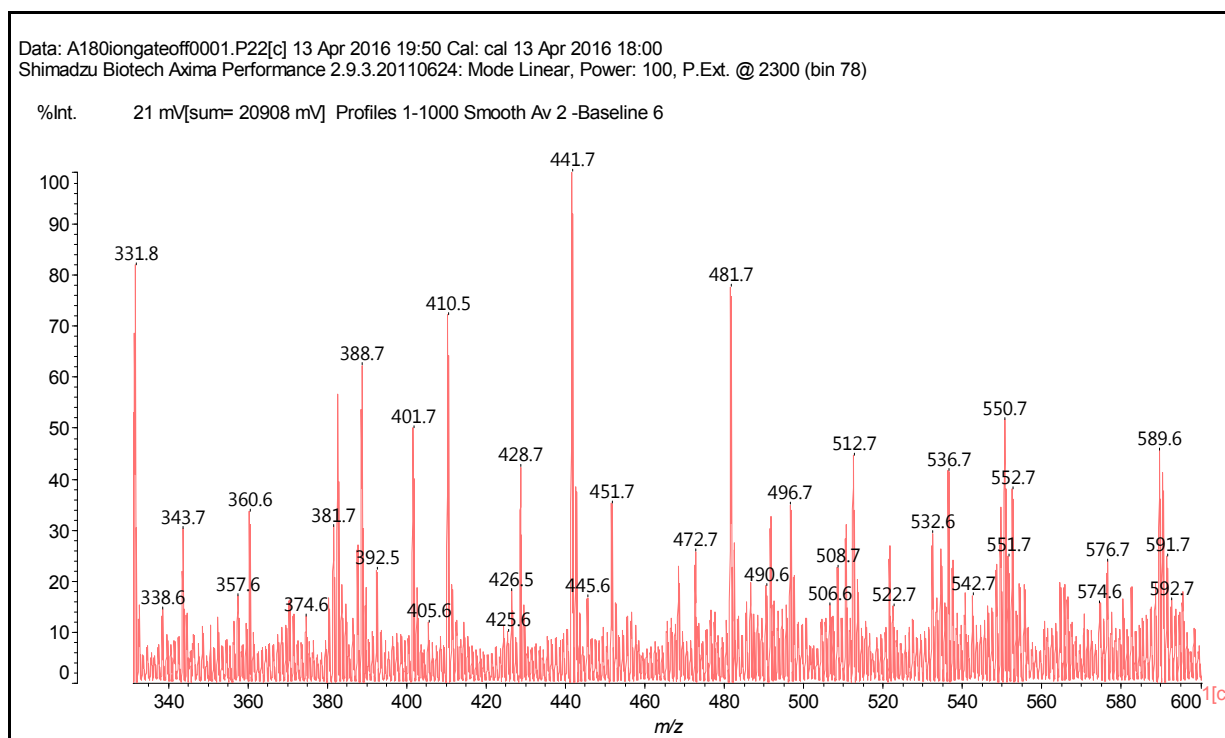

**Figure S24.** MALDI ToF spectrum of the reaction of catechin monomer + hexamethylenediamine + pTSA at 185 °C; 350–800 Da range.

A100

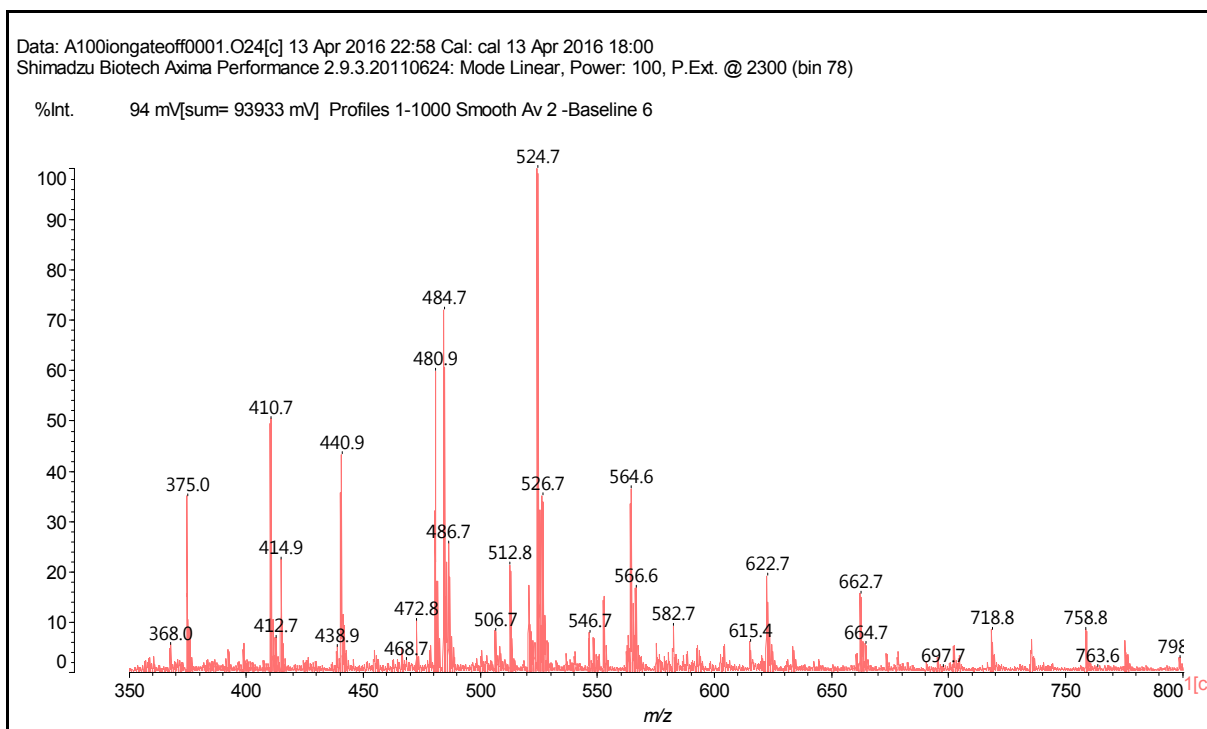

Figure S25. MALDI ToF spectrum of the reaction of catechin monomer + hexamethylenediamine + pTSA at 100 °C. 350–800 Da range.

A100

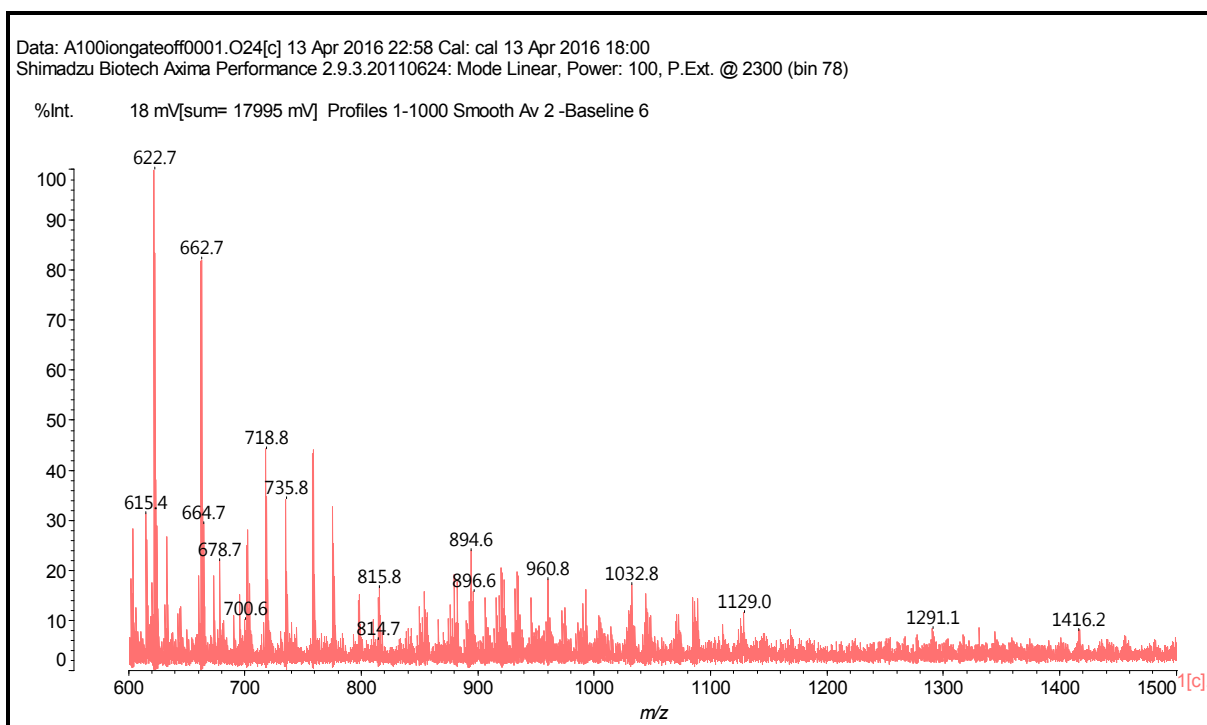

Figure S26. MALDI ToF spectrum of the reaction of catechin monomer + hexamethylenediamine + pTSA at 100 °C; 600–1500 Da range.

A65

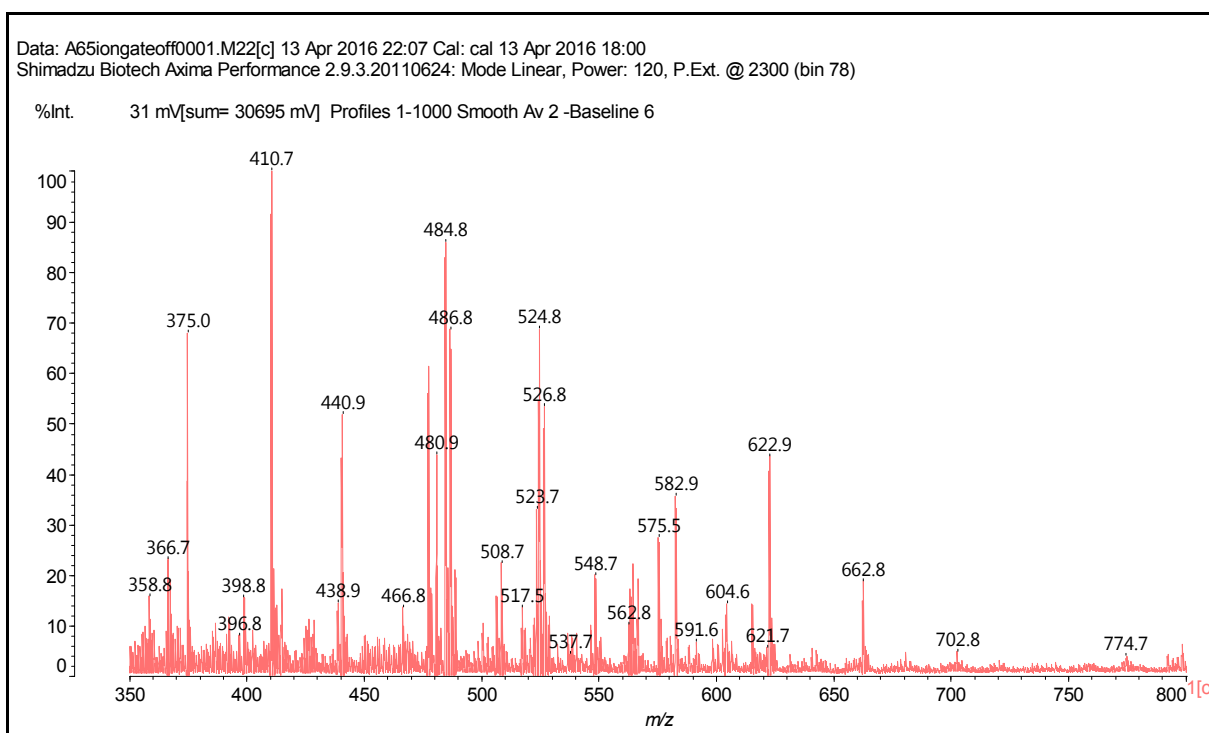

**Figure S27.** MALDI ToF spectrum of the reaction of catechin monomer + hexamethylenediamine + pTSA at 65 °C; 350–800 Da range.

A65

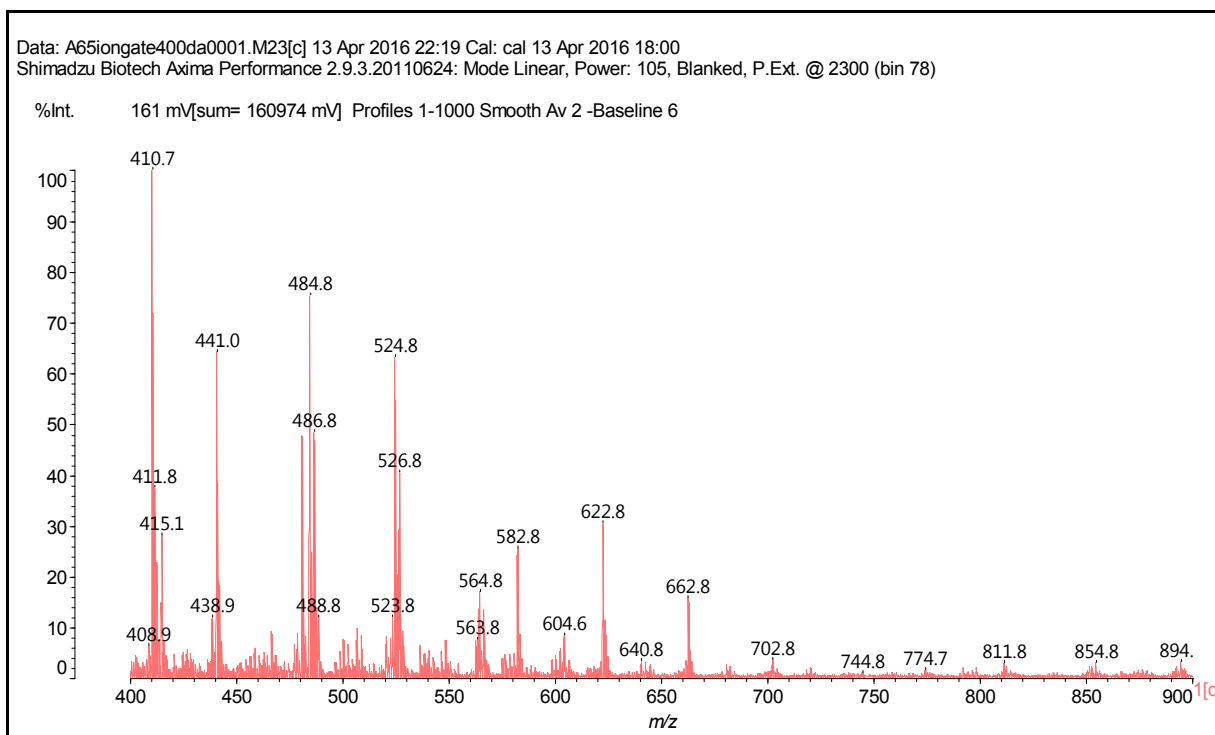

**Figure S28.** MALDI ToF spectrum of the reaction of catechin monomer + hexamethylenediamine + pTSA at 65 °C; 400–900 Da range.

**CP MAS <sup>13</sup>C NMR**  
**Catechin A180**

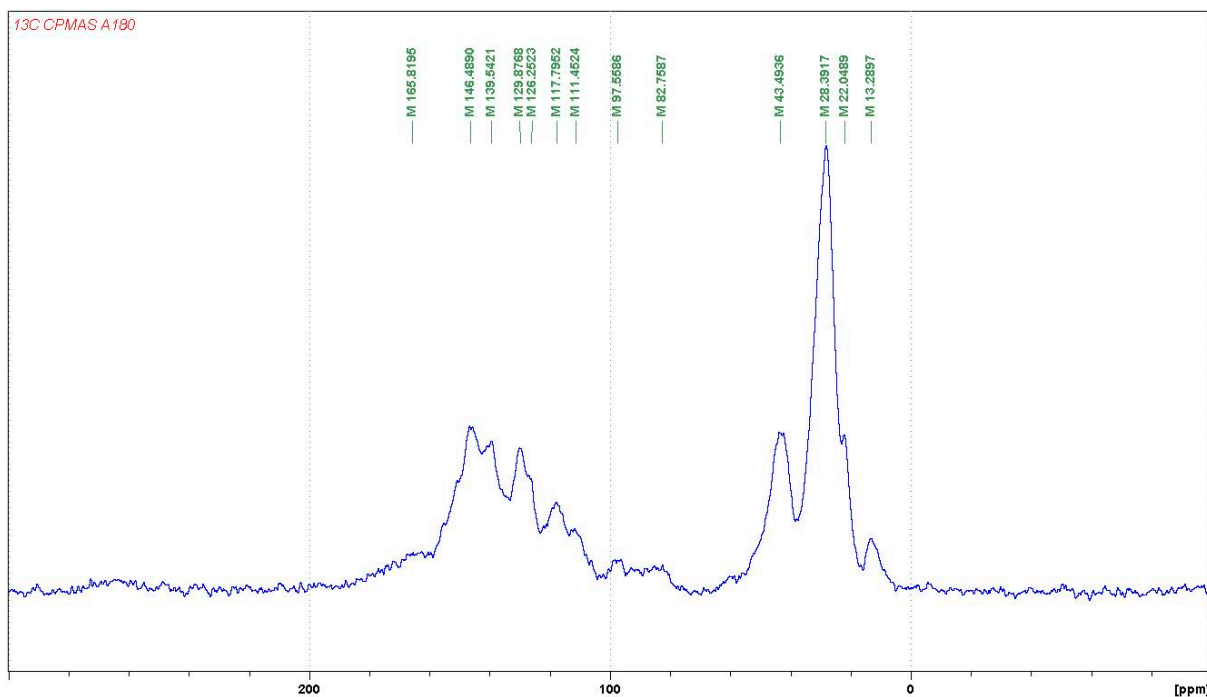

**Figure S29.** CP MAS <sup>13</sup>C NMR spectrum of the reaction of catechin monomer + hexamethylenediamine + pTSA at 185 °C.

**Catechin A 100**

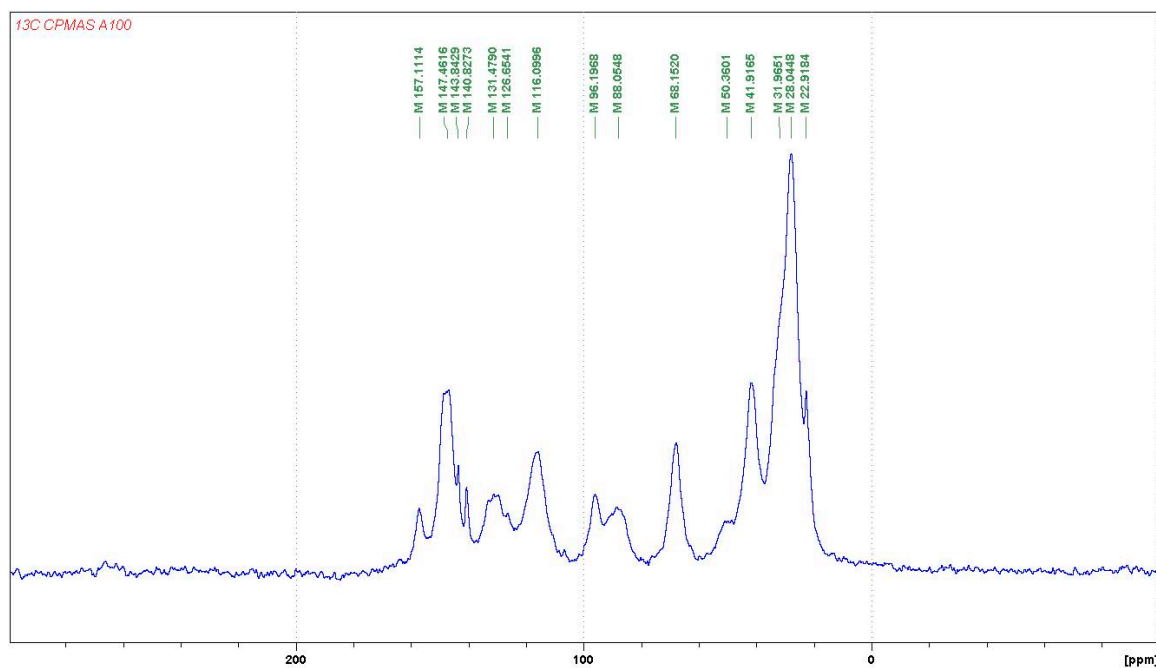

**Figure S30.** CP MAS <sup>13</sup>C NMR spectrum of the reaction of catechin monomer + hexamethylenediamine + pTSA at 100 °C.

### Catechin B180

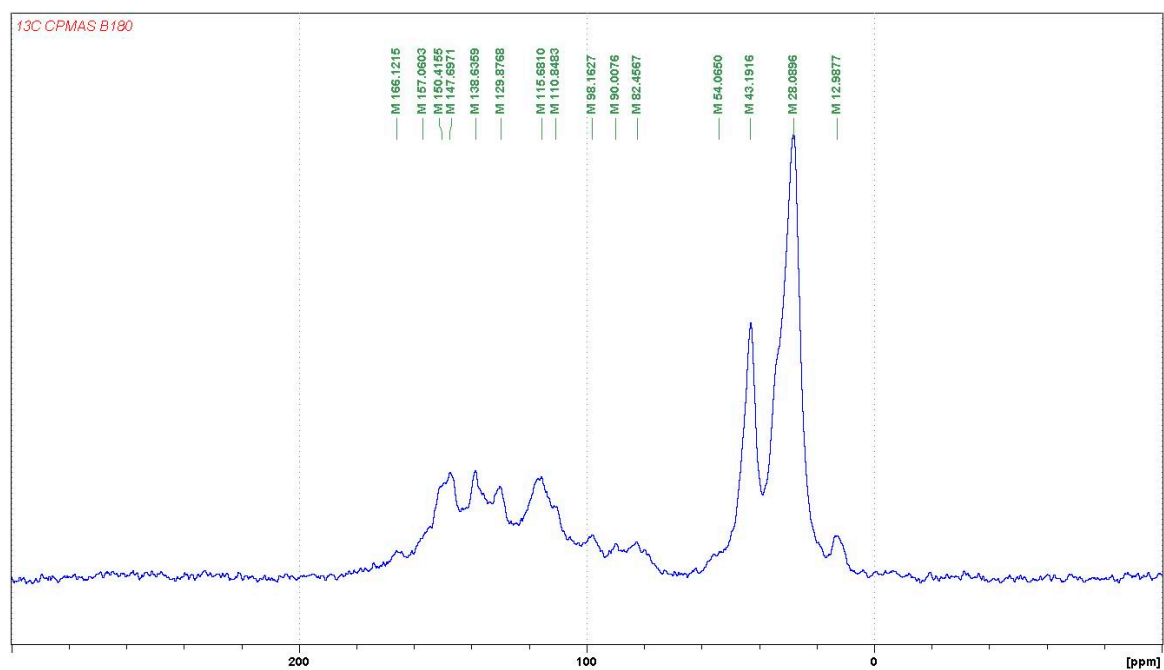

**Figure S31.** CP MAS <sup>13</sup>C NMR spectrum of the reaction of catechin monomer + hexamethylenediamine + NaOH at 185 °C.

### Catechin B100

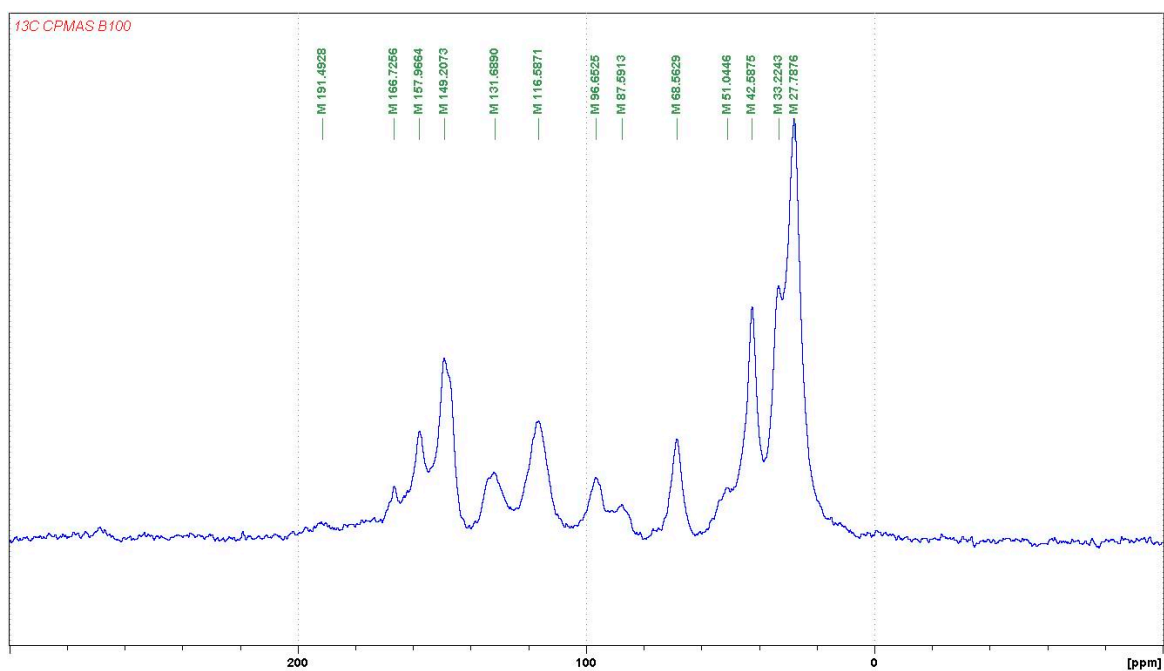

**Figure S32.** CP MAS <sup>13</sup>C NMR spectrum of the reaction of catechin monomer + hexamethylenediamine + NaOH at 100 °C.



**Catechin SAB 180**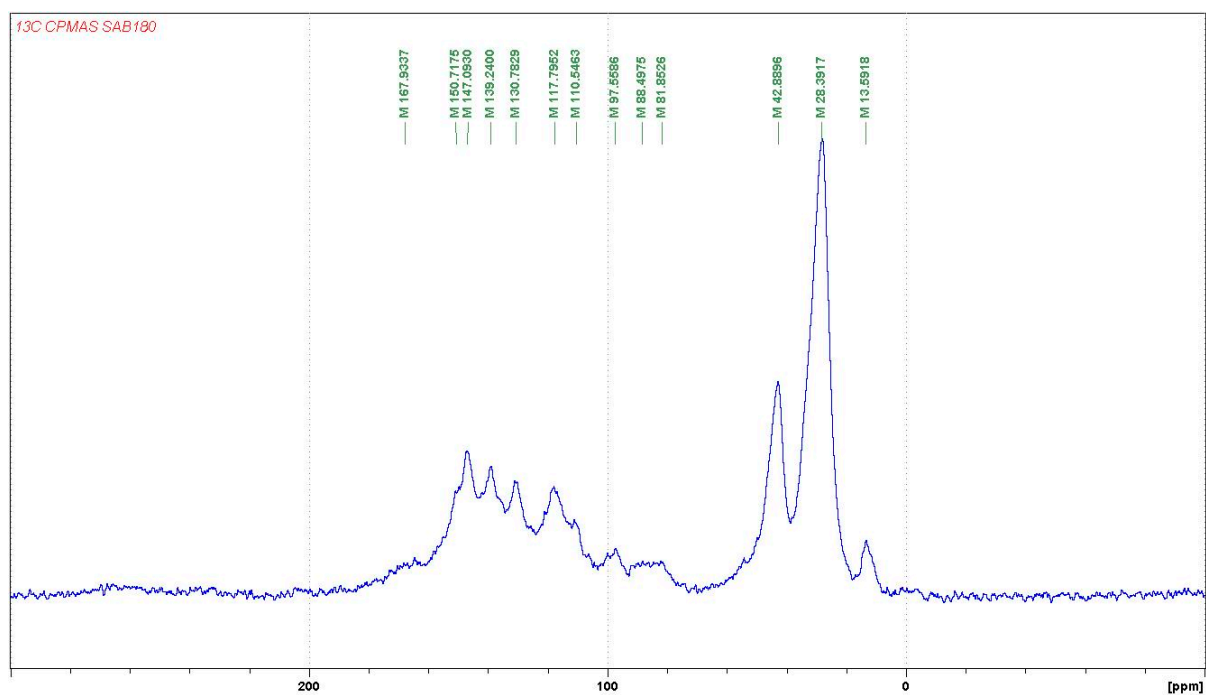

**Figure S33.** CP MAS <sup>13</sup>C NMR spectrum of the uncatalysed reaction of catechin monomer + hexamethylenediamin at 185 °C.

**Catechin SAB100**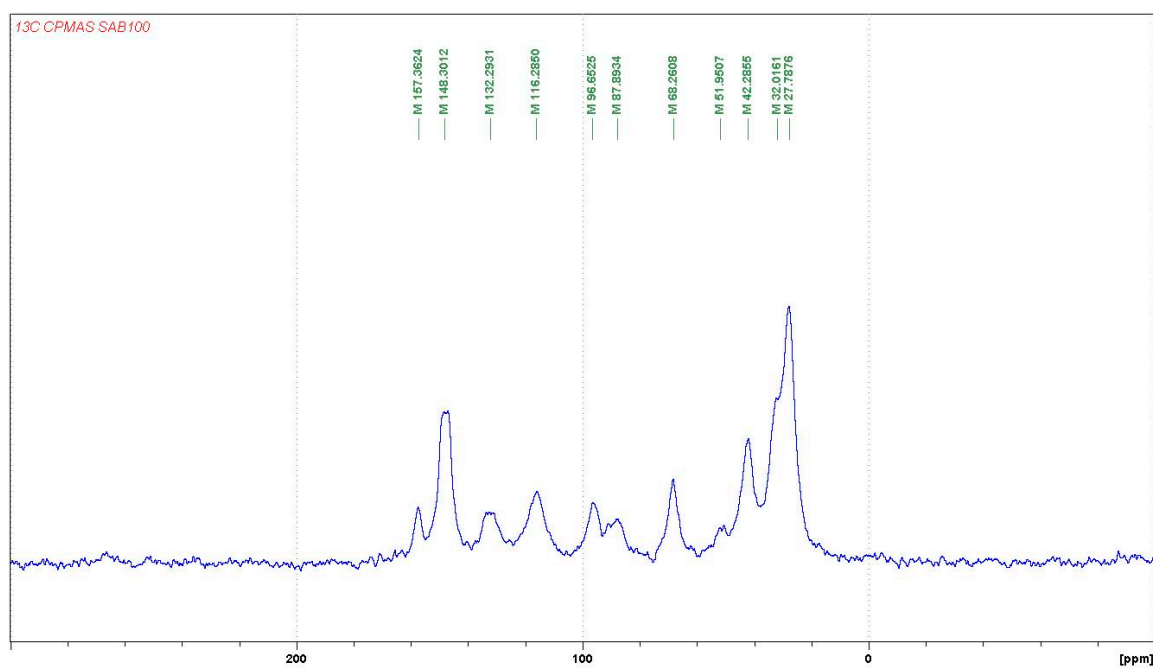

**Figure S34.** CP MAS <sup>13</sup>C NMR spectrum of the uncatalysed reaction of catechin monomer + hexamethylenediamin at 100 °C.
